# Supplementary material for: Lipidomic profiling reveals biosynthetic relationships between phospholipids and diacylglycerol ethers in the deep-sea soft coral Paragorgia arborea
Source: PubMed Central journal article supplement (PMC8553863; doi:10.1038/s41598-021-00876-5), 2021-10-28
Supplement: 41598_2021_876_MOESM1_ESM.pdf [file 41598_2021_876_MOESM1_ESM.pdf]

## Supplementary information

# Lipidomic profiling reveals biosynthetic relationships between phospholipids and diacylglycerol ethers in the deep-sea soft coral *Paragorgia arborea*

Andrey B. Imbs & Peter V. Velansky

## Method Section

**Fatty acid analysis.** Fatty acid methyl esters (FAME) were obtained by a treatment of DAGE with 2% H<sub>2</sub>SO<sub>4</sub>/MeOH at 80°C for 2 h in a screw-caped vial under argon, extracted with hexane and purified by preparative TLC developed in benzene. 4,4-Dimethyloxazoline (DMOX) derivatives of FA were prepared according to Svetashev (2011). A gas chromatography analysis of FAME was conducted with a GC-2010 chromatograph (Shimadzu, Kyoto, Japan) with a flame ionization detector (Imbs & Grigorchuk, 2019). An Equity-5 (Supelco, Bellefonte, USA) capillary column (30 m × 0.25 mm i.d., film thickness 25 μm) was held for 2 min at 170°C, then heated with a 2°C min<sup>-1</sup> ramp to 240°C that was held for 5 min. The injector (250°C) and detector (260°C) temperatures were constant. Helium was used as the carrier gas at a linear velocity of 30 cm s<sup>-1</sup>. Identification of FAs was confirmed by GC–MS of their FAME and DMOX derivatives using a GCMS-2010 Ultra instrument (Shimadzu, Kyoto, Japan) (electron impact at 70 eV) and a MDN-5ms (Supelco, Bellefonte, USA) capillary column (30 m × 0.25 mm i.d., film thickness 25 μm). Carrier gas was He at 30 cm s<sup>-1</sup>. The GC–MS analysis of FAME was performed at 160°C with a 2°C min<sup>-1</sup> ramp to 240°C that was held for 20 min. The injector and detector temperatures were 250°C. GC–MS of DMOX derivatives was performed at 210°C with a 3°C min<sup>-1</sup> ramp to 270°C that was held for 40 min. The injector and detector temperatures were 270°C. Spectra were compared with the NIST library and mass spectra archive.

**Alkylglycerol analysis.** 1-*O*-alkyl-glycerols were obtained by treatment of DAGE with 1N NaOH/MeOH according to Hanuš et al. (2009). The alkylglycerols were converted to their trimethylsilyl derivatives by 200 μL of *N,O*-bis(trimethylsilyl)acetamide and 100 μL of chlorotrimethylsilane; the reaction was carried out at 70°C for 20 min in a screw-caped vial under argon. After addition of 200 μL of diethyl ether, 1 μL of the silylated fraction was injected into a Shimadzu GCMS-QP5050A instruments (Kyoto, Japan) with a SLB-5ms capillary column (30 m × 0.25 mm i.d., film thickness 25 μm; Supelco, Bellefonte, USA). The GC oven program had an initial temperature of 200°C, a 2°C min<sup>-1</sup> run to 290°C, and a final hold at 290°C for 20 min. The injector temperature was 270°C (split 1:14), the interface temperature was 240°C, and the carrier gas (helium) flow rate was 28.2 cm s<sup>-1</sup>. The scan range was from 50 to 650 *m/z*, the solvent delay was 3 min.

**Analysis of DAGE molecular species.** Analysis was performed on a Shimadzu LCMS-IT-TOF (Kyoto, Japan) system equipped with a LC-20A Prominence chromatograph and high-resolution tandem ion-trap/time-of-flight mass spectrometer according to Rybin et al. (2017). Separation of DAGE molecular species were performed on an Ascentis C18 column (100 mm × 2.1 mm i.d.; 3 μm particle size) at 40°C. The solvent flow rate was 0.2 mL min<sup>-1</sup>. HPLC was carried out according to Mu et al. (2000) with a modified eluent composition. Solvent A: acetonitrile; solvent B: propan-2-ol–hexane (2:1, by vol.). Water (0.1% by volume) was added to all solvents. Compounds were eluted isocratically with a solvent A–solvent B mixture (90:10, by vol.) for 5 min, followed by a linear gradient to a solvent A–solvent B mixture (65:35, by vol.) for 40 min, and kept in solvent B (100%) for 5 min before returning to the initial solvent system. The range of detection was *m/z* 400–1200 (APCI, positive and negative ion detection). The potential in the ion

source was  $-4.5$  kV. The drying gas ( $N_2$ ) pressure was 25 kPa. The nebulizer gas ( $N_2$ ) flow rate was  $2\text{ L min}^{-1}$ . The interface temperature was  $300^\circ\text{C}$ . The collision gas (Ar) concentration was 50%.

The HRMS spectra of each molecular species of DAGE contained positive quasi-molecular ion  $[M+H]^+$  with fragment ions  $[M-R'\text{CO}_2]^+$ ,  $[M-R''\text{CO}_2]^+$ , and  $[M-OR''']^+$ , as well as negative cluster ion  $[M+2H_2O-H]^-$  without fragmentation. The negative ions provided the precise values of monoisotopic molecular masses of all the components. The regiospecific positions of FAs and alkyl groups in DAGE molecules were determined according to Hartvigsen et al. (2001). In brief, the positive fragment ion with the highest intensity was assigned to the fragment of DAGE after elimination of a FA molecule from the *sn*-2 position. The positive fragment ion with a lower intensity (less than 50%) was assigned to the fragment of DAGE after elimination of a FA molecule from the *sn*-3 position. The positive fragment ion with the lowest intensity (10% and less) appeared after elimination of an alcohol molecule from the *sn*-1 position of the quasi-molecular ion.

#### References of the Method Section

- Hanuš, L. O., Levitsky, D. O., Shkrob, I. & Dembitsky, V. A. Plasmalogens, fatty acids and alkyl glyceryl ethers of marine and freshwater clams and mussels. *Food Chem.* **16**, 491–498 (2009).
- Hartvigsen, K., Ravandi, A., Bukhave, K., Holmer, G. & Kuksis, A. Regiospecific analysis of neutral ether lipids by liquid chromatography/electrospray ionization/single quadrupole mass spectrometry: validation with synthetic compounds. *J. Mass Spectrom.* **36**, 1116–1124 (2001).
- Imbs, A. B. & Grigorchuk, V. P. Lipidomic study of the influence of dietary fatty acids on structural lipids of cold-water nudibranch molluscs. *Sci. Rep.* **9**, 20013, doi:10.1038/s41598-019-56746-8 (2019).
- Mu, H., Kalo, P., Xu, X. & Høy, C.-E. Chromatographic methods in the monitoring of lipase-catalyzed interesterification. *Eur. J. Lipid Sci. Tech.* **102**, 202–211 (2000).
- Rybin, V. G., Imbs, A. B., Demidkova, D. A. & Ermolenko, E. V. Identification of molecular species of monoalkyldiacylglycerol from the squid *Berryteuthis magister* using liquid chromatography–APCI high-resolution mass spectrometry. *Chem. Phys. Lipids* **202**, 55–61, doi: 10.1016/j.chemphyslip.2016.11.008 (2017).
- Svetashev, V. I. Mild method for preparation of 4,4-dimethyloxazoline derivatives of polyunsaturated fatty acids for GC–MS. *Lipids* **46**, 463–467, <https://doi.org/10.1007/s11745-011-3550-4> (2011).

**Supplementary Table S1.** Fatty acid and alkyl group composition (% of total, mean  $\pm$  SD,  $n = 3$ ) of diacylglycerol ethers (DAGE) in the soft coral *Paragorgia arborea*. Fatty acid methyl esters were obtained by acidic methanolysis of DAGE, 1-*O*-alkyl-*sn*-glycerols were obtained by alkaline hydrolysis of DAGE.

| Fatty acid | Content, %     | Alkyl group | Content, %     |
|------------|----------------|-------------|----------------|
| 14:0       | 3.2 $\pm$ 0.5  | 14:0        | 10.3 $\pm$ 2.5 |
| 16:0       | 9.4 $\pm$ 1.2  | 15:0        | 1.5 $\pm$ 0.3  |
| 16:1n-7    | 3.1 $\pm$ 0.3  | 16:0        | 71.8 $\pm$ 8.4 |
| 18:0       | 2.5 $\pm$ 0.9  | 16:1        | 2.0 $\pm$ 0.2  |
| 18:1n-9    | 26.0 $\pm$ 5.3 | 17:0        | 1.0 $\pm$ 0.5  |
| 20:1n-11   | 2.3 $\pm$ 0.3  | 17:1        | 0.1 $\pm$ 0.1  |
| 20:1n-9    | 1.6 $\pm$ 0.2  | 18:0        | 2.8 $\pm$ 2.2  |
| 20:1n-7    | 2.8 $\pm$ 0.8  | 18:1        | 9.3 $\pm$ 3.1  |
| 20:4n-6    | 18.3 $\pm$ 5.3 | 18:2        | 0.2 $\pm$ 0.2  |
| 20:5n-3    | 9.9 $\pm$ 0.5  | 20:0        | 0.1 $\pm$ 0.1  |
| 22:1n-9    | 2.0 $\pm$ 0.2  | 20:1        | 0.6 $\pm$ 0.2  |
| 22:1n-7    | 2.9 $\pm$ 0.7  | Other       | 0.4 $\pm$ 0.1  |
| 22:6n-3    | 2.6 $\pm$ 0.6  |             |                |
| 24:5n-6    | 2.1 $\pm$ 0.8  |             |                |
| 24:6n-3    | 2.9 $\pm$ 1.3  |             |                |
| Other      | 8.6 $\pm$ 1.7  |             |                |

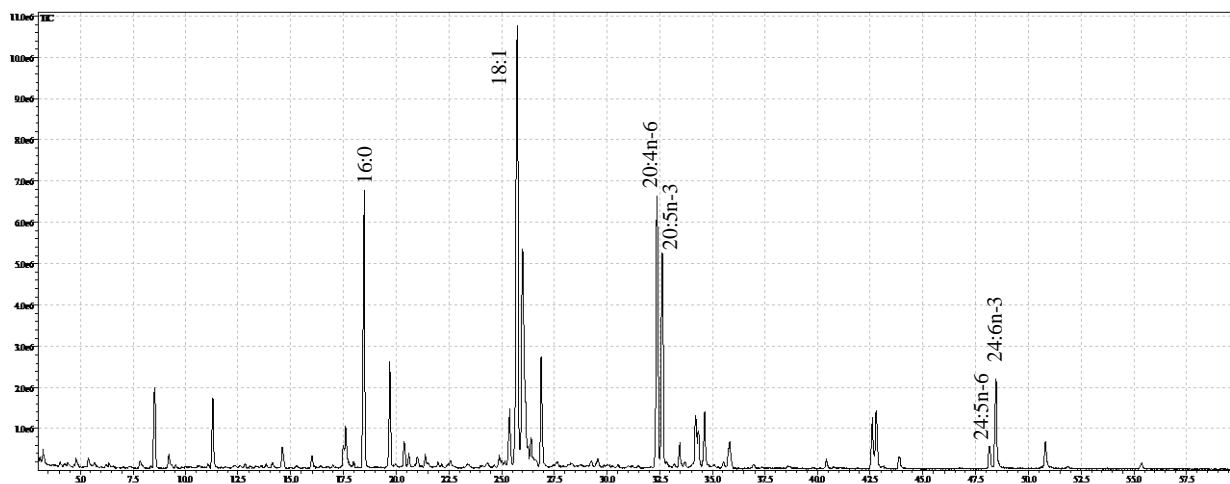

**Supplementary Figure S1.** A GC–MS chromatogram of fatty acid methyl esters (FAME) obtained by hydrolysis of diacylglycerol ethers (DAGE) of the soft coral *Paragorgia arborea*.

### FAME 20:4n-6

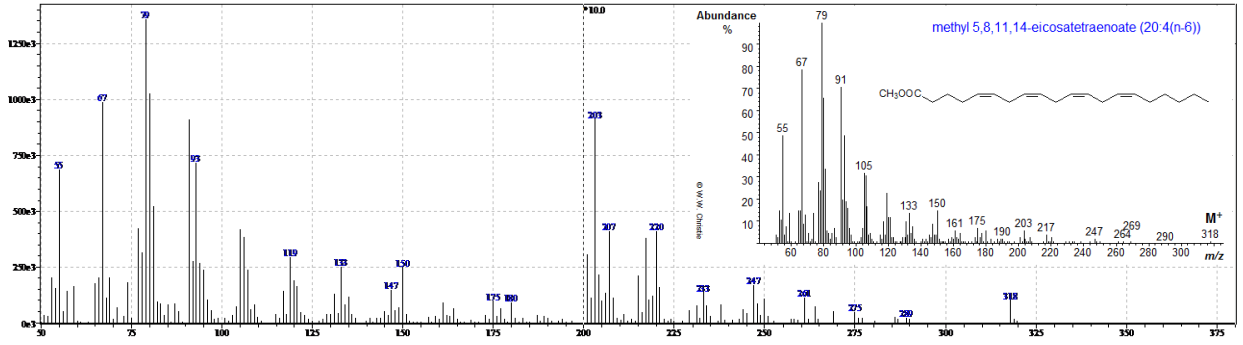

### FAME 20:5n-3

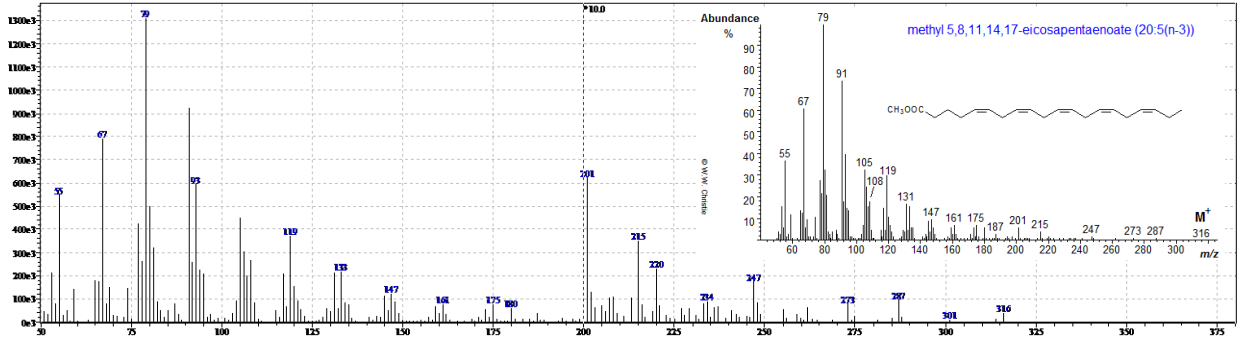

### FAME 24:5n-6

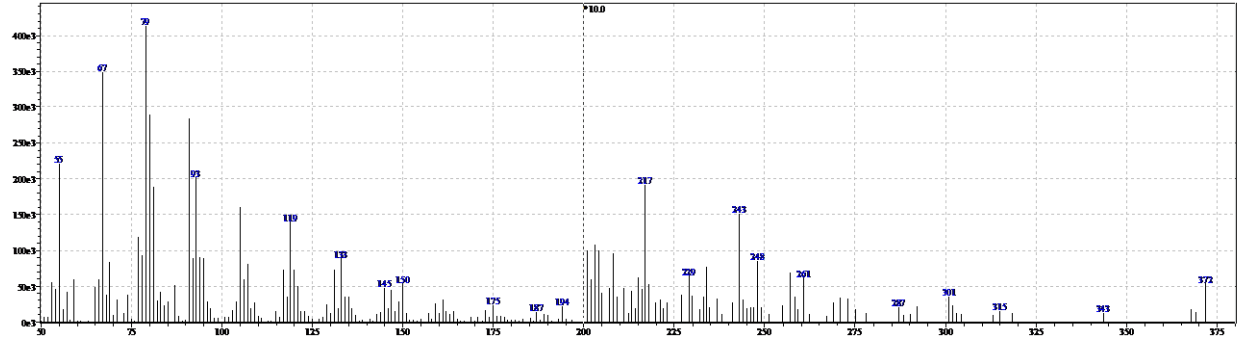

### FAME 24:6n-3

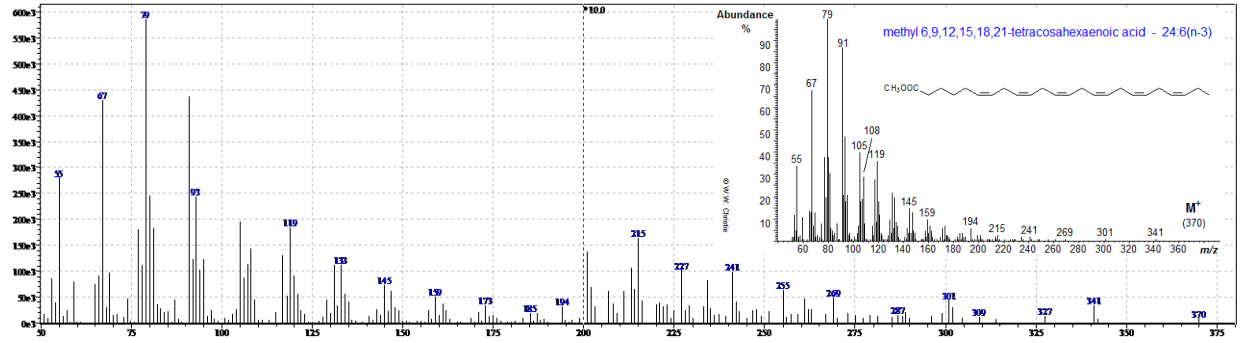

### DMOX 20:4n-6

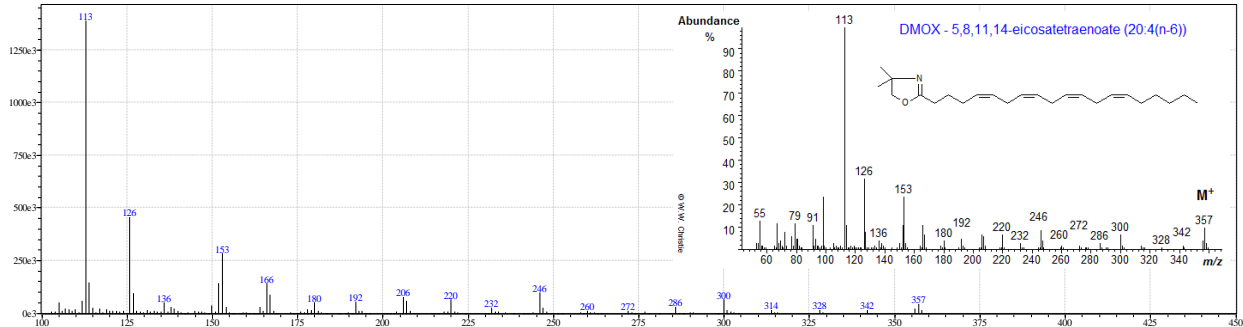

### DMOX 20:5n-3

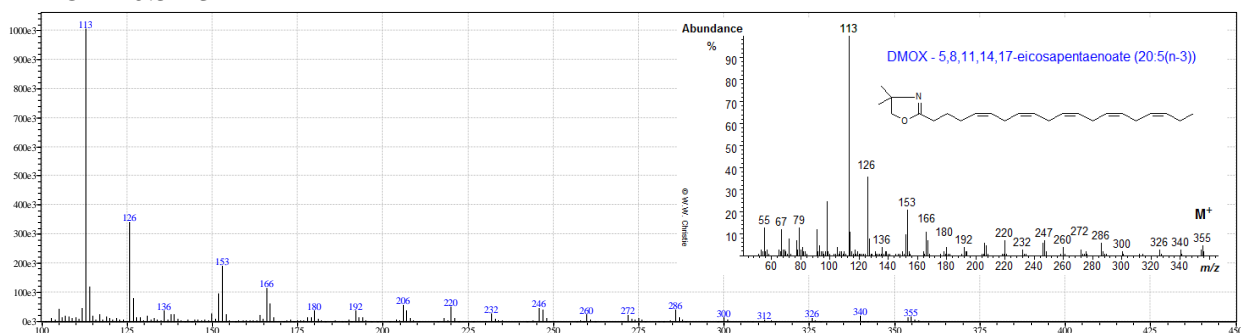

### DMOX 24:5n-6

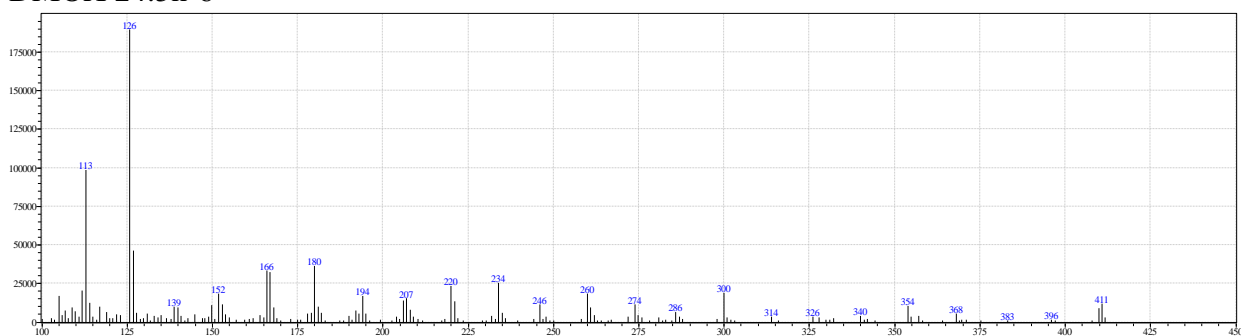

### DMOX 24:6n-3

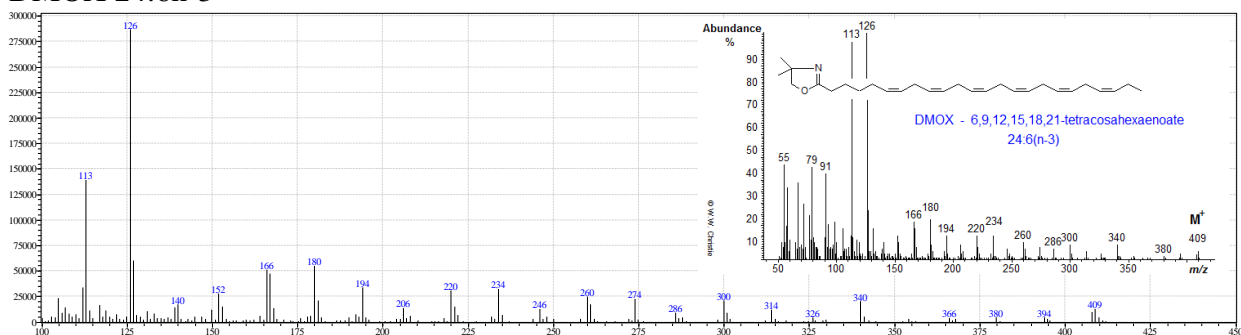

**Supplementary Figure S2.** Mass spectra of major polyunsaturated fatty acid methyl esters (FAME) and their 4,4-dimethyloxazoline derivatives (DMOX) obtained from diacylglycerol ethers (DAGE) of the soft coral *Paragorgia arborea*. For reference, the correspondence spectrum from the Archive of mass spectra were placed in the upper right corner of each spectrum obtained. (Christie, W.W. The LipidWeb. Archive of mass spectra. (2021) <https://www.lipidmaps.org/resources/lipidweb/index.php?page=ms/methylesters.htm>; <https://www.lipidmaps.org/resources/lipidweb/index.php?page=ms/dmox.htm>).

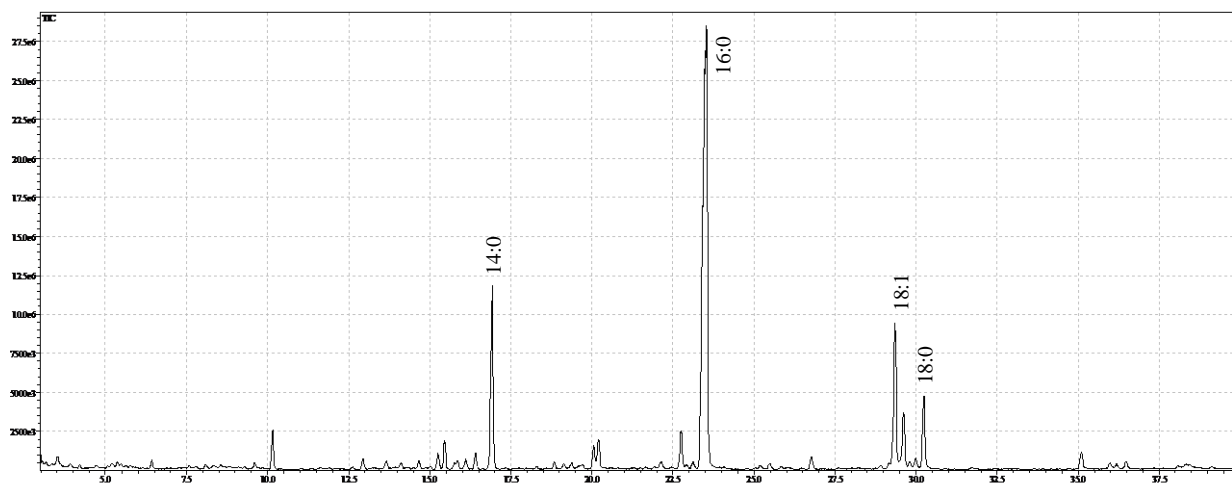

**Supplementary Figure S3.** A GC-MS chromatogram of trimethylsilyl (TMS) derivatives of 1-*O*-alkyl-*sn*-glycerols obtained by alkaline hydrolysis of DAGE of the soft coral *Paragorgia arborea*. Names of alkyl groups are indicated.

### 1-*O*-hexadecyl-2,3-*O*-di(trimethylsilyl)-*sn*-glycerol

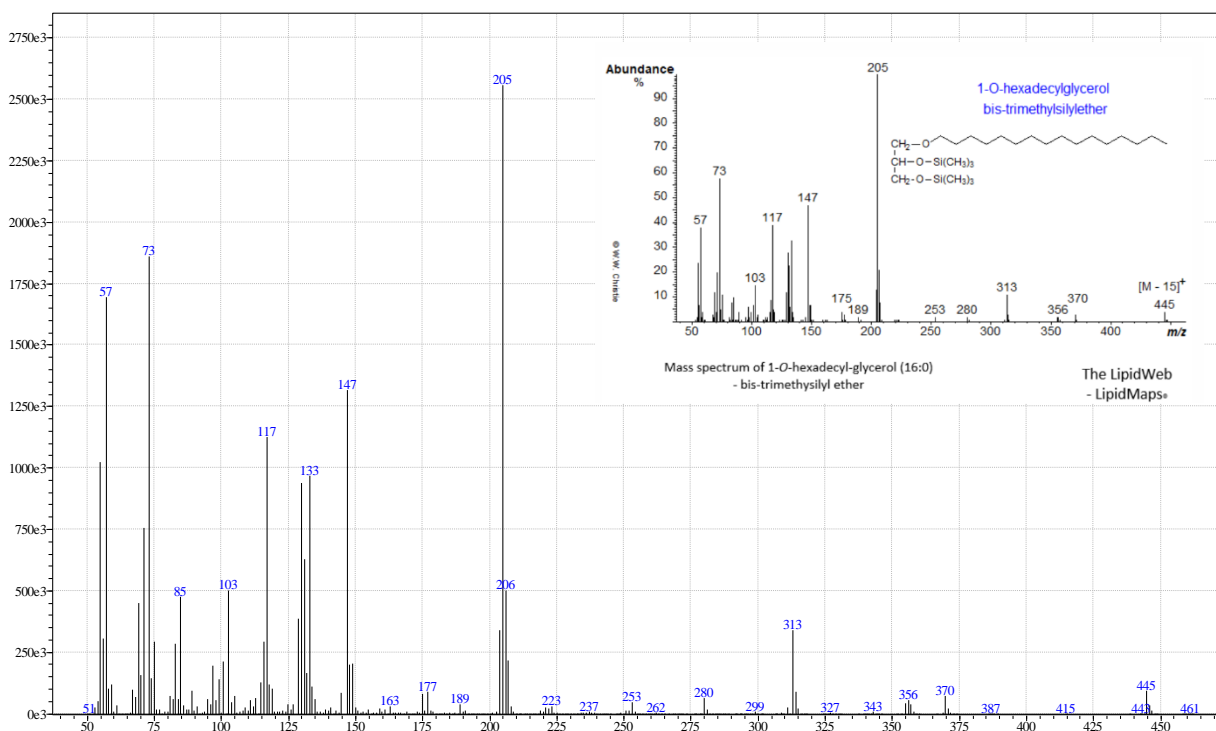

### 1-*O*-octadecenyl-2,3-*O*-di(trimethylsilyl)-*sn*-glycerol

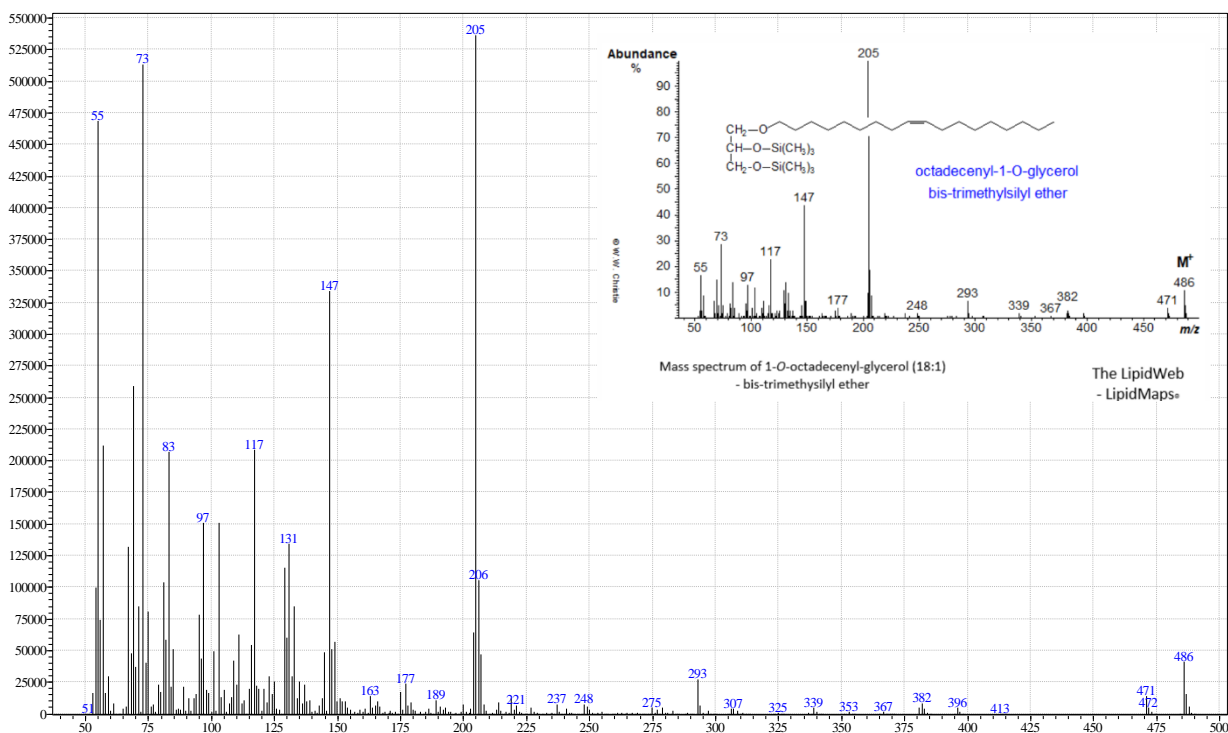

**Supplementary Figure S4.** Mass spectra of major di-TMS derivatives of 1-*O*-alkyl-*sn*-glycerols obtained by alkaline hydrolysis of DAGE of the soft coral *Paragorgia arborea*. For reference, the correspondence spectrum from the Archive of mass spectra were placed in the upper right corner of each spectrum obtained (Christie, W.W. The LipidWeb. Archive of mass spectra. (2021) <https://www.lipidmaps.org/resources/lipidweb/index.php?page=ms/others/others-arch/index1.htm>).



**Supplementary Figure S5. Examples of DAGE mass spectra.** The fraction of diacylglycerol ethers (DAGE) of the soft coral *Paragorgia arborea* was analyzed using reverse-phase liquid chromatography and high resolution tandem mass spectrometry at atmospheric pressure chemical ionization (APCI) in positive (C+) mode. **(A)** Chromatograms of a total ion current (TIC) and four selected molecular ions ( $m/z$  811.7160, 865.7610, 919.8070, and 951.8710). The next sections show the observed and calculated masses ( $m/z$ ) of molecular ions, brutto-formulars, double bond equivalent (DBE), differences between observed and calculated masses, the mass spectra at the peak top and MS/MS spectra of the target ions, the predicted structures, and the product ions ( $m/z$ ) of **(B)** DAGE 16:0e/20:5/18:1, **(C)** DAGE 16:0e/20:5/14:0, **(D)** DAGE 16:0e/24:6/18:1, and **(E)** DAGE 16:0e/20:4/24:1. The name of each DAGE molecular species shows the alkyl and acyl groups (number of carbon atoms : number of double bonds) at positions *sn*-1/*sn*-2/*sn*-3 of a glycerol ether backbone.

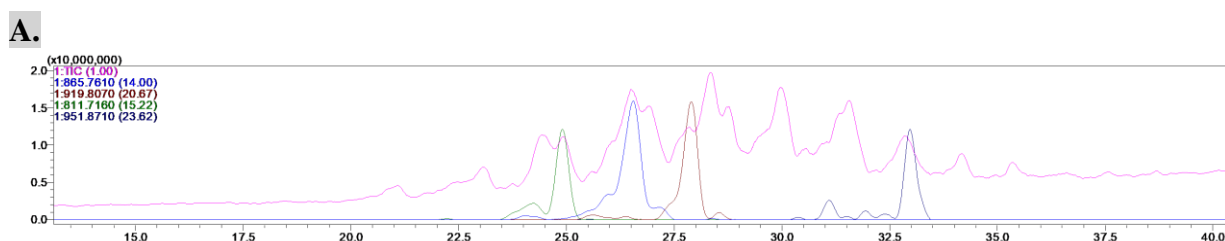

**B. DAGE 16:0e/20:5/18:1**

| M+H      | Mass     | Formula     | DBE | Diff    | Diff (ppm) | Diff (mDa) |
|----------|----------|-------------|-----|---------|------------|------------|
| 865.7610 | 864.7571 | C57 H100 O5 | 8   | 0.00335 | 3.88       | 3.4        |

Event#: 1 MS(C+)

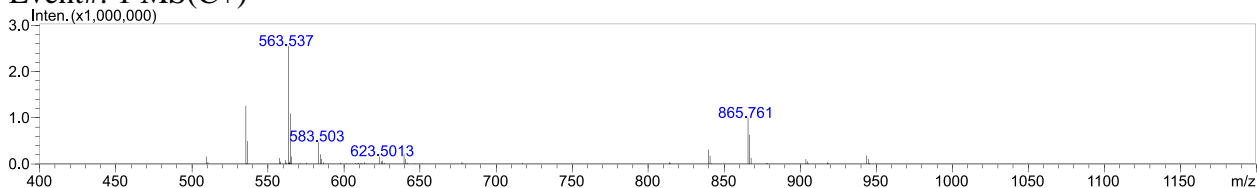

Event#: 2 MS/MS(C+) Precursor : 865.766

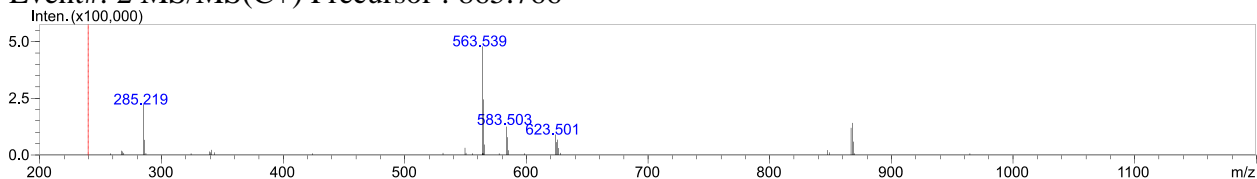

| MS      | MS2            | Loss     |        |             |
|---------|----------------|----------|--------|-------------|
| 865.761 | <b>563.539</b> | 302.222  | 20:5// |             |
|         | 583.503        | 282.258  | 18:1// |             |
|         | 623.5013       | 242.2597 | 16:0e  | C16 H34 O   |
|         | 285.2193       |          |        | C20 H28 O/7 |

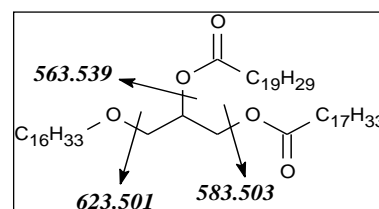

**C. DAGE 16:0e/20:5/14:0**

| M+H      | Mass     | Formula    | DBE | Diff   | Diff (ppm) | Diff (mDa) |
|----------|----------|------------|-----|--------|------------|------------|
| 811.7160 | 810.7101 | C53 H94 O5 | 7   | 0.0014 | 1.73       | 1.4        |

Event#: 1 MS(C+)

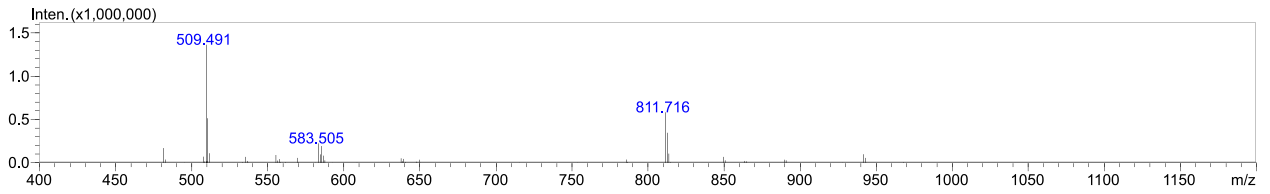

Event#: 2 MS/MS(C+) Precursor : 811.7165

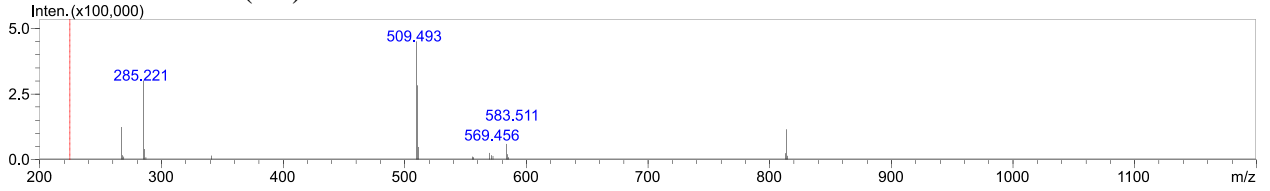

| MS       | MS2            | Loss     |        |             |
|----------|----------------|----------|--------|-------------|
| 811.7149 | <b>509.493</b> | 302.2219 | 20:5// |             |
|          | 583.511        | 228.2039 | 14:0// |             |
|          | 569.456        | 242.2589 | 16:0e  | C16 H34 O   |
|          | 285.221        |          |        | C20 H28 O/7 |

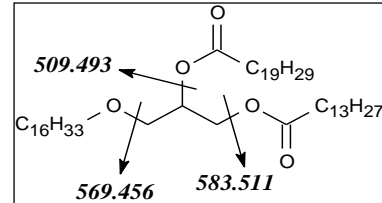

D. DAGE 16:0e/24:6/18:1

| M+H     | Mass    | Formula     | DBE | Diff   | Diff (ppm) | Diff (mDa) |
|---------|---------|-------------|-----|--------|------------|------------|
| 919.807 | 918.804 | C61 H106 O5 | 9   | 0.0043 | 4.68       | 4.3        |

Event#: 1 MS(C+)

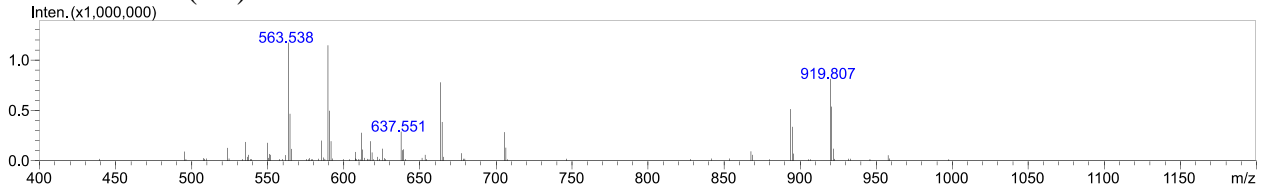

Event#: 2 MS/MS(C+) Precursor : 919.8157

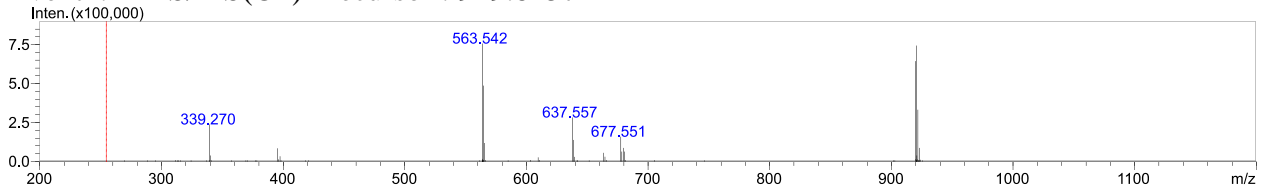

| MS      | MS2            | Loss    |        |            |
|---------|----------------|---------|--------|------------|
| 919.807 | <b>563.542</b> | 356.265 | 24:6// | C24 H36 O2 |
|         | 637.557        | 282.25  | 18:1// | C18 H34 O2 |
|         | 677.551        | 242.256 | 16:0e  | C16 H34 O  |
|         | 339.27         |         |        | C24 H34 O  |

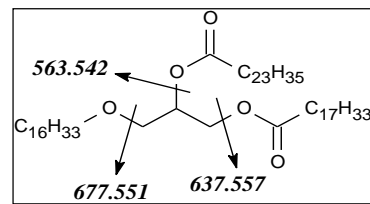

|  |         |  |  |             |
|--|---------|--|--|-------------|
|  | 285.221 |  |  | C20 H28 O/7 |
|--|---------|--|--|-------------|

E. DAGE 16:0e/20:4/24:1

| M+H     | Mass     | Formula     | DBE | Diff   | Diff (ppm) | Diff (mDa) |
|---------|----------|-------------|-----|--------|------------|------------|
| 951.871 | 950.8666 | C63 H114 O5 | 7   | 0.0029 | 3.05       | 2.9        |

Event#: 1 MS(C+)

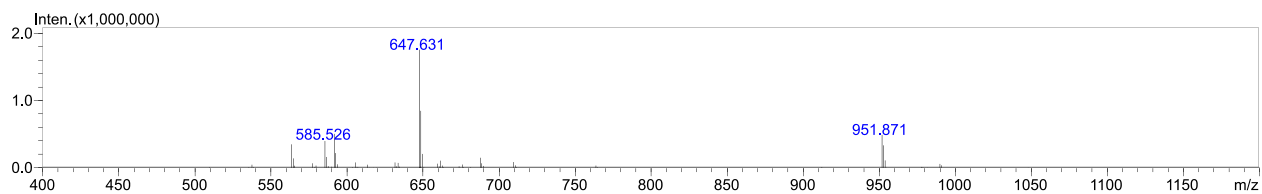

Event#: 2 MS/MS(C+) Precursor : 951.876

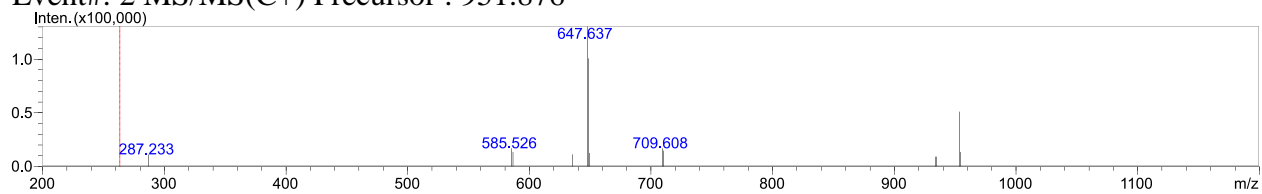

| MS      | MS2             | Loss     |        |            |
|---------|-----------------|----------|--------|------------|
| 951.871 | <b>647.6315</b> | 304.2395 | 20:4// |            |
|         | 585.5221        | 366.3489 | 24:1// | C24 H46 O2 |
|         | 709.608         | 242.263  | 16:0e  | C16 H34 O  |
|         | 287.233         |          |        | C20 H30 O  |

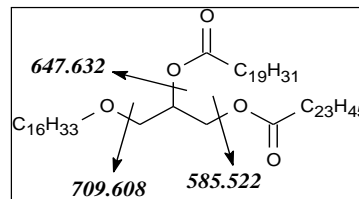

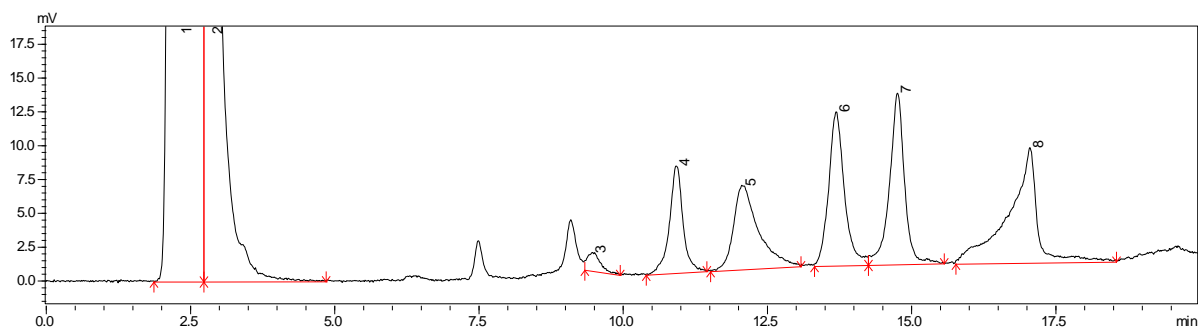

**Supplementary Figure S6. Analysis of polar lipid classes.** Separation of ceramide aminoethylphosphonate (CAEP) and glycerophospholipids (GPL) of the soft coral *Paragorgia arborea* by high-performance liquid chromatography in HILIC mode with ELSD detection. Peak numbers: 1, triacylglycerol; 2, cholesterol; 3, inositol GPL (PI); 4, ethanolamine GPL (PE); 5, serine GPL (PS); 6, CAEP; 7, choline GPL (PC); 8, system peak.

**Supplementary Table S2.** Molecular species of diacylglycerol ethers (DAGE). Obtained and calculated molecular ions [M+H]<sup>+</sup> (*m/z*), brutto-formulas, characteristic ions (*m/z*), peak areas, retention time on HPLC column (min), and content (% of total, mean ± SD, *n* = 6) of 1-*O*-alkyl-2,3-diacyl-*sn*-glycerols in the soft coral *Paragorgia arborea*. The name of each molecular species shows the alkyl and acyl groups (number of carbon atoms : number of double bonds) at positions *sn*-1/*sn*-2/*sn*-3 of a glycerol ether backbone.

| M+H      | MW(+)    | Brutto-formula | R-Alkyl  | R-Acyl (sn-2) | R-Acyl (sn-3) | Molecular species ( <i>sn</i> -1/ <i>sn</i> -2/ <i>sn</i> -3) | RT (min) | S1       | S2       | S3       | S4       | S5       | S6       | Content, % |
|----------|----------|----------------|----------|---------------|---------------|---------------------------------------------------------------|----------|----------|----------|----------|----------|----------|----------|------------|
| 811.7237 | 810.7165 | C53H94O5       | 569.4601 | 509.4955      | 583.5109      | 16:0e/20:5/14:0                                               | 25.753   | 8443997  | 18513485 | 2711882  | 10258288 | 7733655  | 15299183 | 2.6 ± 1.1  |
| 813.7306 | 812.7234 | C53H96O5       | 571.4687 | 509.4875      | 585.5164      | 16:0e/20:4/14:0                                               | 28.093   | 8899556  | 12675471 | 2750115  | 18249241 | 12135521 | 13390603 | 2.9 ± 1.2  |
| 837.7366 | 836.7294 | C55H96O5       | 623.5069 | 535.5102      | 555.4809      | 14:0e/20:5/18:1                                               | 27.181   | 9635751  | 22446968 | 6380774  | 12805648 | 11997116 | 19666666 | 3.5 ± 1.0  |
| 839.7527 | 838.7455 | C55H98O5       | 625.5225 | 535.5107      | 557.4962      | 14:0e/20:4/18:1                                               | 29.664   | 8883955  | 16207212 | 4602478  | 18722788 | 13843502 | 16408339 | 3.3 ± 1.0  |
| 839.7537 | 838.7465 | C55H98O5       | 597.4954 | 537.5261      | 583.5116      | 16:0e/20:5/16:0                                               | 31.364   | 10899448 | 18131623 | 3908538  | 18786981 | 13335830 | 17439576 | 3.5 ± 1.2  |
| 841.7758 | 840.7686 | C55H100O5      | 599.5063 | 537.52        | 585.5184      | 16:0e/20:4/16:0                                               | 34.257   | 11242057 | 16135227 | 4475248  | 24829142 | 17084854 | 17743316 | 3.9 ± 1.5  |
| 865.769  | 864.7618 | C57H100O5      | 623.508  | 563.5421      | 583.51        | 16:0e/20:5/18:1                                               | 33.132   | 21444699 | 33262762 | 16287436 | 38196665 | 33637770 | 35903224 | 7.7 ± 1.3  |
| 867.7746 | 866.7674 | C57H102O5      | 625.5147 | 563.5367      | 585.5178      | 16:0e/20:4/18:1                                               | 35.849   | 20054851 | 29274904 | 12876087 | 50342908 | 37614829 | 35013060 | 7.9 ± 2.8  |
| 885.7328 | 884.7256 | C59H96O5       | 643.4718 | 583.5106      | 583.5106      | 16:0e/20:5/20:5                                               | 26.859   | 2744425  | 11369028 | 12891897 | 2338692  | 11363426 | 12214500 | 2.3 ± 1.4  |
| 887.7511 | 886.7439 | C59H98O5       | 645.4901 | 585.5208      | 583.5132      | 16:0e/20:5/20:4                                               | 29.305   | 3877641  | 17709304 | 22899148 | 7165831  | 21831978 | 20787312 | 4.1 ± 2.4  |
| 889.7614 | 888.7542 | C59H100O5      | 647.5004 | 585.525       | 585.525       | 16:0e/20:4/20:4                                               | 31.962   | 3678223  | 12526733 | 13347219 | 8499983  | 15090501 | 14553752 | 2.9 ± 1.1  |
| 891.7853 | 890.7781 | C59H102O5      | 623.5087 | 589.5588      | 609.5285      | 18:1e/20:5/18:1                                               | 34.609   | 6585959  | 18546889 | 10886897 | 8532845  | 13184044 | 17644101 | 3.2 ± 0.8  |
| 893.7996 | 892.7924 | C59H104O5      | 651.53   | 537.52        | 637.5506      | 16:0e/24:6/16:0                                               | 38.963   | 10085392 | 12863108 | 6711535  | 11471073 | 11525669 | 13252299 | 2.9 ± 0.5  |
| 893.7996 | 892.7924 | C59H104O5      | 651.53   | 591.5669      | 583.5019      | 16:0e/20:5/20:1                                               | 39.387   | 6121241  | 14337988 | 9376261  | 18673149 | 17550342 | 16776547 | 3.5 ± 0.8  |
| 895.8159 | 894.8087 | C59H106O5      | 653.5549 | 591.5746      | 585.5259      | 16:0e/20:4/20:1                                               | 42.364   | 15714140 | 27616804 | 12887991 | 33590999 | 28458939 | 30035327 | 6.3 ± 1.3  |
| 919.813  | 918.8058 | C61H106O5      | 677.5475 | 563.5369      | 637.551       | 16:0e/24:6/18:1                                               | 40.597   | 19726841 | 19834616 | 14216594 | 10541893 | 16887674 | 20057655 | 4.6 ± 1.6  |
| 921.8301 | 920.8229 | C61H108O5      | 679.5691 | 619.6045      | 583.5123      | 16:0e/20:5/22:1                                               | 45.87    | 8019933  | 6050098  | 4635004  | 6015354  | 6916530  | 6870614  | 1.8 ± 0.6  |
| 921.8302 | 920.823  | C61H108O5      | 679.5692 | 563.5416      | 639.5716      | 16:0e/24:5/18:1                                               | 43.737   | 7235513  | 14553805 | 8950371  | 9924244  | 12430569 | 14734131 | 2.9 ± 0.3  |
| 923.8482 | 922.841  | C61H110O5      | 681.5854 | 619.6051      | 585.526       | 16:0e/20:4/22:1                                               | 49.151   | 11647637 | 16870100 | 13246916 | 20363103 | 21502522 | 20102807 | 4.5 ± 0.5  |
| 939.7801 | 938.7729 | C63H102O5      | 697.5191 | 583.5098      | 637.5588      | 16:0e/20:5/24:6                                               | 33.909   | 3208138  | 5019616  | 12966177 | 217408   | 10260943 | 7628108  | 1.8 ± 1.5  |
| 941.8032 | 940.796  | C63H104O5      | 701.5579 | 583.5108      | 637.5596      | 16:0e/20:4/24:6                                               | 36.664   | 4160945  | 7766681  | 18923607 | 3031763  | 16460549 | 12051705 | 2.8 ± 2.1  |
| 945.8324 | 944.8252 | C63H108O5      | 677.5428 | 589.5539      | 663.5674      | 18:1e/24:6/18:1                                               | 42.133   | 4428575  | 6026322  | 5028977  | 1419506  | 4710240  | 5914754  | 1.2 ± 0.5  |
| 947.8496 | 946.8424 | C63H110O5      | 705.5886 | 591.5738      | 637.5588      | 16:0e/24:6/20:1                                               | 46.924   | 11162654 | 9968368  | 8627482  | 3963222  | 8916651  | 10263471 | 2.4 ± 1.1  |
| 949.8645 | 948.8573 | C63H112O5      | 735.6348 | 591.5752      | 611.5309      | 14:0e/24:5/22:1                                               | 50.427   | 3550607  | 9692034  | 8119851  | 5233421  | 9214532  | 10211291 | 2.0 ± 0.6  |
| 949.8645 | 948.8573 | C63H112O5      | 681.5879 | 645.619       | 611.5309      | 18:1e/20:4/22:1                                               | 50.702   | 2847787  | 2327782  | 2435536  | 1695975  | 2832940  | 2716706  | 0.7 ± 0.2  |
| 951.8674 | 950.8602 | C63H114O5      | 709.6064 | 647.6364      | 585.5265      | 16:0e/20:4/24:1                                               | 58.015   | 3472514  | 10673544 | 6713905  | 5250310  | 8124057  | 10382803 | 1.9 ± 0.5  |
| 975.8692 | 974.862  | C65H114O5      | 733.6084 | 619.5986      | 637.5504      | 16:0e/24:6/22:1                                               | 54.55    | 7084296  | 5260176  | 5919039  | 1275793  | 5327809  | 5681289  | 1.4 ± 0.8  |
| 977.8943 | 976.8871 | C65H116O5      | 735.6194 | 619.5971      | 639.5658      | 16:0e/24:5/22:1                                               | 59.345   | 3110222  | 6610436  | 5674297  | 1352920  | 5178572  | 6493077  | 1.3 ± 0.5  |

**Supplementary Table S3.** Molecular species of polar lipids. Molecular ions [M+H]<sup>+</sup> (m/z), brutto-formulas, differences between obtained and calculated masses (ppm), peak areas, retention time on HPLC column (min), and content (% of lipid class and total polar lipids, mean ± SD, n = 3) of five major polar lipid classes in the soft coral *Paragorgia arborea*. 1,2-Diacyl groups are abbreviated as X/Y, where X and Y are acyl groups (number of carbon atoms : number of double bonds). Ether phospholipids are abbreviated as Xa/Y or Xp/Y, where Xa is alkyl group and Xp is alk-1-enyl group at position *sn*-1 of a glycerol ether backbone, and Y is acyl group at position *sn*-2. CAEP molecules are abbreviated as Xd/Y; Xd, sphingoid base; Y, acyl group. The green background indicates the molecular species with the concentration more than 5% of the correspondent lipid class. Trace peaks of molecular species that showed only the fragment ion of the characteristic polar groups are marked by “x”.

| Molecular ion, [M+H] <sup>+</sup> (m/z)      | Brutto-formula  | Diff (ppm) | Name       | Retention time (min) | Sample 1 (area) | Sample 2 (area) | Sample 3 (area) | Content (% of lipid class, mean ± SD) | Average content (% of polar lipids) |
|----------------------------------------------|-----------------|------------|------------|----------------------|-----------------|-----------------|-----------------|---------------------------------------|-------------------------------------|
| <b>Ceramide aminoethylphosphonate (CAEP)</b> |                 |            |            |                      |                 |                 |                 |                                       |                                     |
| 641.55                                       | C36 H69 N2 O5 P | 0.13       | 20:3d/14:0 | 13.585               | 1571977         | 443894          | 615756          | 0.05 ± 0.02                           | 0.01                                |
| 641.55                                       | C36 H69 N2 O5 P | 0.13       | 19:3d/15:0 | 14.722               | 2773373         | 124533          | 1937426         | 0.06 ± 0.04                           | 0.02                                |
| 641.55                                       | C36 H69 N2 O5 P | 0.13       | 18:3d/16:0 | 15.459               | 26015349        | 3986322         | 15503796        | 0.73 ± 0.06                           | 0.21                                |
| 643.55                                       | C36 H71 N2 O5 P | 1.19       | 18:2d/16:0 | 16.438               | 68510067        | 15867123        | 87655557        | 2.94 ± 0.98                           | 0.87                                |
| 643.55                                       | C36 H71 N2 O5 P | 0.1        | 18:2d/16:0 | 17.184               | 254282422       | 37062049        | 135911939       | 6.78 ± 0.83                           | 1.99                                |
| 645.55                                       | C36 H73 N2 O5 P |            | 18:1d/16:0 | 18.452               | 11137488        | 374839          | 7130723         | 0.24 ± 0.15                           | 0.07                                |
| 645.55                                       | C36 H73 N2 O5 P |            | 18:1d/16:0 | 19.294               | 9801580         | 1207878         | 5034225         | 0.25 ± 0.05                           | 0.07                                |
| 647.55                                       | C36 H75 N2 O5 P |            | 18:0d/16:0 | 21.182               | 2315324         | 241077          | 824176          | 0.05 ± 0.02                           | 0.01                                |
| 655.55                                       | C37 H71 N2 O5 P | 4.03       | 19:3d/16:0 | 16.015               | 28726191        | 4944984         | 19298809        | 0.87 ± 0.02                           | 0.26                                |
| 655.55                                       | C37 H71 N2 O5 P | 1.74       | 19:3d/16:0 | 17.22                | 613221175       | 131726104       | 448104900       | 20.62 ± 2.01                          | 6.06                                |
| 657.55                                       | C37 H73 N2 O5 P | 1.54       | 19:2d/16:0 | 19.066               | 732195364       | 111878004       | 417520462       | 20.22 ± 1.79                          | 5.94                                |
| 659.6                                        | C37 H75 N2 O5 P | 2.64       | 19:1d/16:0 | 20.911               | 65631624        | 10214982        | 35010442        | 1.79 ± 0.20                           | 0.53                                |
| 661.6                                        |                 |            | x          | 22.558               | 1768644         | 143266          | 740076          | 0.04 ± 0.01                           | 0.01                                |
| 667.6                                        | C38 H71 N2 O5 P |            | 20:4d/16:0 | 15.538               | 1350211         | 246163          | 576151          | 0.04 ± 0.01                           | 0.01                                |
| 669.55                                       | C38 H73 N2 O5 P | 1.62       | 20:3d/16:0 | 18.512               | 392013585       | 57737160        | 228119250       | 10.77 ± 1.03                          | 3.17                                |
| 669.55                                       | C38 H73 N2 O5 P |            | 20:3d/16:0 | 19.94                | 782815          | 1766949         | 6126164         | 0.20 ± 0.16                           | 0.06                                |
| 671.6                                        | C38 H75 N2 O5 P | 1.59       | 20:2d/16:0 | 20.449               | 93285090        | 22323219        | 121173197       | 4.08 ± 1.37                           | 1.20                                |
| 671.6                                        | C38 H75 N2 O5 P | 1.44       | 20:2d/16:0 | 21.121               | 265914844       | 41226952        | 143732470       | 7.26 ± 0.77                           | 2.13                                |
| 671.6                                        | C38 H75 N2 O5 P |            | 20:2d/16:0 | 22.046               | 15291422        | 895049          | 5239048         | 0.29 ± 0.16                           | 0.08                                |
| 673.6                                        | C38 H77 N2 O5 P | 0.76       | 20:1d/16:0 | 22.594               | 44620798        | 8058869         | 25339923        | 1.30 ± 0.12                           | 0.38                                |
| 673.6                                        | C38 H77 N2 O5 P |            | 20:1d/16:0 | 23.454               | 4641249         | 310101          | 1747151         | 0.09 ± 0.05                           | 0.03                                |
| 683.6                                        | C39 H75 N2 O5 P |            | 21:3d/16:0 | 20.164               | 3168799         | 1797635         | 4889885         | 0.21 ± 0.11                           | 0.06                                |
| 683.6                                        | C39 H75 N2 O5 P | 3.86       | 21:3d/16:0 | 20.975               | 9966037         | 1765762         | 6104046         | 0.30 ± 0.01                           | 0.09                                |
| 683.6                                        | C39 H75 N2 O5 P |            | 21:3d/16:0 | 21.71                | 4058856         | 277419          | 1792430         | 0.08 ± 0.04                           | 0.02                                |

|                                               |                 |       |            |        |           |          |           |              |      |
|-----------------------------------------------|-----------------|-------|------------|--------|-----------|----------|-----------|--------------|------|
| 685.6                                         | C39 H77 N2 O5 P |       | 21:2d/16:0 | 21.962 | 1735831   | 1289300  | 883289    | 0.11 ± 0.10  | 0.03 |
| 685.6                                         | C39 H77 N2 O5 P |       | 21:2d/16:0 | 22.37  | 10294025  | 703598   | 6588063   | 0.25 ± 0.11  | 0.07 |
| 685.6                                         | C39 H77 N2 O5 P | 5.28  | 21:0d/16:1 | 23.16  | 18069062  | 1519505  | 10607247  | 0.43 ± 0.15  | 0.13 |
| 687.6                                         | C39 H79 N2 O5 P |       | 21:0d/16:0 | 24.283 | 10508292  | 1920472  | 7159739   | 0.33 ± 0.01  | 0.10 |
| 695.6                                         | C40 H75 N2 O5 P |       | 22:4d/16:0 | 19.523 | 766067    | 102919   | 406510    | 0.02 ± 0.00  | 0.01 |
| 695.6                                         | C40 H75 N2 O5 P | 3.65  | 22:4d/16:0 | 20.332 | 14684386  | 2772572  | 18175277  | 0.59 ± 0.21  | 0.17 |
| 697.6                                         | C40 H75 N2 O5 P | 1.7   | 22:3d/16:0 | 21.86  | 28076337  | 4249480  | 15337304  | 0.76 ± 0.08  | 0.22 |
| 697.6                                         | C40 H77 N2 O5 P | 2.6   | 22:3d/16:0 | 22.784 | 45607629  | 7274893  | 27266097  | 1.30 ± 0.08  | 0.38 |
| 699.55                                        | C40 H79 N2 O5 P | 3.38  | 22:2d/16:0 | 23.967 | 473246711 | 93648865 | 332105927 | 15.24 ± 0.86 | 4.48 |
| 699.55                                        | C40 H79 N2 O5 P |       | 22:2d/16:0 | 24.527 | 844731    | 113408   | 1314795   | 0.04 ± 0.02  | 0.01 |
| 699.55                                        | C40 H79 N2 O5 P |       | 22:2d/16:0 | 24.905 | 263145    | 27178    | 315089    | 0.01 ± 0.00  | 0.00 |
| 701.6                                         | C40 H81 N2 O5 P |       | 22:1d/16:0 | 24.984 | 4331948   | 8636574  | 27038197  | 0.95 ± 0.72  | 0.28 |
| 709.6                                         |                 |       | x          | 22.599 | 496783    | 73669    | 110827    | 0.01 ± 0.01  | 0.00 |
| 709.6                                         |                 |       | x          | 23.516 | 2446867   | 209129   | 1555841   | 0.06 ± 0.02  | 0.02 |
| 711.6                                         |                 |       | x          | 24.97  | 4278590   | 433630   | 2880674   | 0.11 ± 0.03  | 0.03 |
| 713.65                                        | C41 H83 N2 O5 P |       | 22:2d/17:0 | 25.194 | 6564154   | 919680   | 4160743   | 0.18 ± 0.02  | 0.05 |
| 721.6                                         | C42 H77 N2 O5 P |       | 22:4d/18:1 | 21.196 | 680045    | 30812    | 537463    | 0.02 ± 0.01  | 0.00 |
| 727.6                                         | C42 H83 N2 O5 P | 2.12  | 24:2d/16:0 | 26.132 | 10228912  | 2242960  | 7374629   | 0.35 ± 0.04  | 0.10 |
| <b>Ethanolamine glycerophospholipids (PE)</b> |                 |       |            |        |           |          |           |              |      |
| 704.5                                         | C39 H79 N O7 P  |       | 16:0a/18:1 | 25.989 | 1196886   | 401901   | 1162055   | 0.40 ± 0.04  | 0.06 |
| 710.5                                         |                 |       | x          | 20.304 | 135664    | 60919    | 106430    | 0.05 ± 0.02  | 0.01 |
| 710.5                                         |                 |       | x          | 20.819 | 324501    | 63615    | 241009    | 0.08 ± 0.02  | 0.01 |
| 712.5                                         | C39 H71 N O8 P  |       | 14:0/20:4  | 22.492 | 581415    | 179949   | 613711    | 0.19 ± 0.00  | 0.03 |
| 712.5                                         | C39 H71 N O8 P  |       | 14:1/20:3  | 23.12  | 664941    | 150862   | 604089    | 0.19 ± 0.03  | 0.03 |
| 722.5                                         |                 |       | x          | 19.643 | 401301    | 55168    | 139743    | 0.08 ± 0.05  | 0.01 |
| 722.5                                         |                 |       | x          | 20.131 | 158610    | 60525    | 127376    | 0.05 ± 0.01  | 0.01 |
| 722.5                                         |                 |       | x          | 20.886 | 620541    | 154768   | 314989    | 0.16 ± 0.06  | 0.02 |
| 722.5                                         |                 |       | x          | 21.253 | 260636    | 72084    | 68619     | 0.06 ± 0.04  | 0.01 |
| 722.5                                         | C41 H72 N O7 P  | 5.8   | 16:0p/20:5 | 22.446 | 5120784   | 1946518  | 6446455   | 1.95 ± 0.20  | 0.30 |
| 724.5                                         |                 |       | x          | 21.435 | 178181    | 386710.5 | 773421    | 0.24 ± 0.18  | 0.04 |
| 724.5                                         | C41 H74 N O7 P  |       | 16:1a/20:5 | 22.087 | 2199361   | 781455   | 1309300   | 0.67 ± 0.24  | 0.10 |
| 724.5                                         | C41 H74 N O7 P  | 1.06  | 16:1a/20:4 | 23.004 | 12169314  | 3610641  | 15067635  | 4.24 ± 0.37  | 0.65 |
| 724.5                                         | C41 H74 N O7 P  | 7.09  | 16:0p/20:4 | 24.27  | 31793057  | 9455883  | 33525513  | 10.49 ± 0.25 | 1.62 |
| 726.6                                         | C41 H76 N O7 P  | 3.15  | 16:0a/20:4 | 24.692 | 38179477  | 12774984 | 51309272  | 14.26 ± 1.47 | 2.20 |
| 728.6                                         | C41 H78 N O7 P  | 22.04 | 36:3a      | 25.555 | 821788    | 94014    | 845337    | 0.21 ± 0.10  | 0.03 |
| 730.6                                         |                 |       | x          | 26.421 | 504638    | 303906   | 583963    | 0.23 ± 0.09  | 0.04 |
| 732.6                                         |                 |       | x          | 28.032 | 349652    | 45079    | 173170    | 0.07 ± 0.04  | 0.01 |
| 736.6                                         |                 |       | x          | 24.302 | 492354    | 120780   | 427555    | 0.14 ± 0.02  | 0.02 |

|       |                |       |            |        |          |          |          |              |      |
|-------|----------------|-------|------------|--------|----------|----------|----------|--------------|------|
| 738.6 |                |       | x          | 21.52  | 745120   | 289000   | 577633   | 0.25 ± 0.07  | 0.04 |
| 738.6 |                |       | x          | 23.841 | 638590   | 68100    | 437101   | 0.14 ± 0.07  | 0.02 |
| 738.6 | C42 H76 N O7 P | 6.1   | 37:5a      | 24.267 | 845694   | 239482   | 685261   | 0.25 ± 0.04  | 0.04 |
| 738.6 | C42 H76 N O7 P | 3.5   | 17:0p/20:4 | 24.921 | 2057199  | 647675   | 2521726  | 0.73 ± 0.04  | 0.11 |
| 738.6 | C42 H76 N O7 P | 7.3   | 17:0p/20:4 | 25.542 | 3592348  | 922570   | 3691217  | 1.12 ± 0.11  | 0.17 |
| 740.6 |                |       | x          | 25.501 | 1231106  | 172675   | 1157624  | 0.32 ± 0.12  | 0.05 |
| 740.6 |                |       | x          | 25.769 | 449050   | 46325    | 80892    | 0.08 ± 0.07  | 0.01 |
| 748.6 | C43 H74 N O7 P | 18.51 | 18:2p/20:4 | 21.954 | 147593   | 32334    | 54321    | 0.03 ± 0.02  | 0.01 |
| 748.6 | C43 H74 N O7 P |       | 18:1p/20:5 | 22.872 | 144105   | 23609    | 52929    | 0.03 ± 0.02  | 0.00 |
| 750.6 | C43 H76 N O7 P | 2.78  | 18:1a/20:5 | 23.574 | 3787479  | 865149   | 4385168  | 1.20 ± 0.22  | 0.18 |
| 750.6 |                |       | x          | 24.495 | 357128   | 99987    | 635531   | 0.14 ± 0.05  | 0.02 |
| 750.6 | C43 H76 N O7 P |       | 18:1p/20:4 | 24.779 | 3064488  | 1197953  | 4926632  | 1.29 ± 0.24  | 0.20 |
| 750.6 | C43 H76 N O7 P |       | 18:0p/20:5 | 25.19  | 174860   | 52504    | 53948    | 0.04 ± 0.02  | 0.01 |
| 750.6 |                |       | x          | 25.318 | 141506   | 129199   | 481937   | 0.11 ± 0.06  | 0.02 |
| 752.6 |                |       | x          | 24.627 | 502501   | 115252   | 296518   | 0.13 ± 0.04  | 0.02 |
| 752.6 | C43 H78 N O7 P | 4.43  | 18:1a/20:4 | 25.107 | 17168878 | 4930133  | 18370757 | 5.63 ± 0.22  | 0.87 |
| 752.6 | C43 H78 N O7 P | 11.75 | 18:0a/20:5 | 25.644 | 987339   | 804434   | 2583674  | 0.67 ± 0.29  | 0.10 |
| 752.6 |                |       | x          | 25.781 | 2597445  | 196250   | 387121   | 0.40 ± 0.41  | 0.06 |
| 752.6 | C43 H78 N O7 P | 2.97  | 18:0p/20:4 | 26.526 | 1447945  | 298400   | 920629   | 0.37 ± 0.11  | 0.06 |
| 754.6 |                |       | 18:0a/20:4 | 26.784 | 1723257  | 579611   | 2328990  | 0.65 ± 0.07  | 0.10 |
| 764.6 |                |       | x          | 24.878 | 311949   | 135259   | 565195   | 0.14 ± 0.03  | 0.02 |
| 764.6 |                |       | x          | 25.219 | 765308   | 169301   | 661973   | 0.22 ± 0.04  | 0.03 |
| 764.6 |                |       | x          | 25.804 | 584468   | 95452    | 720401   | 0.18 ± 0.06  | 0.03 |
| 766.6 | C44 H80 N O7 P | 0.89  | 39:5a      | 26.097 | 999573   | 194925   | 1065081  | 0.29 ± 0.07  | 0.05 |
| 766.6 |                |       | x          | 26.513 | 529553   | 225181   | 788647   | 0.22 ± 0.04  | 0.03 |
| 766.6 |                |       | x          | 27.133 | 349493   | 249885   | 431375   | 0.18 ± 0.09  | 0.03 |
| 768.6 |                |       | x          | 23.401 | 1069153  | 206599   | 788018   | 0.28 ± 0.07  | 0.04 |
| 776.6 | C45 H78 N O7 P |       | 16:1a/24:6 | 24.27  | 1464268  | 415278   | 1238369  | 0.44 ± 0.06  | 0.07 |
| 776.6 | C45 H78 N O7 P | 2.41  | 16:0p/24:6 | 25.691 | 6074665  | 2253818  | 7796948  | 2.31 ± 0.22  | 0.36 |
| 778.6 | C45 H80 N O7 P |       | 16:0a/24:6 | 25.563 | 1934078  | 430864   | 1983699  | 0.58 ± 0.10  | 0.09 |
| 778.6 | C45 H80 N O7 P | 2.04  | 16:1a/24:5 | 25.987 | 28037712 | 8436342  | 30623223 | 9.40 ± 0.15  | 1.45 |
| 778.6 | C45 H80 N O7 P | 0.15  | 16:0p/24:5 | 26.751 | 12090679 | 3669615  | 14457485 | 4.19 ± 0.24  | 0.65 |
| 780.6 | C45 H82 N O7 P | 0.43  | 16:0a/24:5 | 27.105 | 31546409 | 11089511 | 33635773 | 11.07 ± 0.93 | 1.71 |
| 780.6 | C45 H82 N O7 P | 2.48  | 16:0p/24:4 | 27.647 | 987689   | 98916    | 130113   | 0.16 ± 0.15  | 0.02 |
| 782.6 |                |       | x          | 23.547 | 799013   | 75716    | 149311   | 0.13 ± 0.12  | 0.02 |
| 782.6 |                |       | x          | 24.193 | 588193   | 70910    | 131317   | 0.11 ± 0.08  | 0.02 |
| 782.6 |                |       | x          | 24.925 | 1105393  | 114704   | 705130   | 0.24 ± 0.13  | 0.04 |
| 790.6 |                |       | x          | 23.711 | 179956   |          | 68225    | 0.03 ± 0.03  | 0.00 |



|       |                |       |            |        |          |             |          |             |      |
|-------|----------------|-------|------------|--------|----------|-------------|----------|-------------|------|
| 790.6 | C46 H80 N O7 P | 12.69 | 41:7a      | 25.648 | 236821   | 30000       | 135781   | 0.05 ± 0.03 | 0.01 |
| 790.6 | C46 H80 N O7 P | 7.62  | 41:7a      | 25.922 | 389870   | 46452       | 177593   | 0.08 ± 0.05 | 0.01 |
| 790.6 | C46 H80 N O7 P | 3.02  | 41:7a      | 26.124 | 708898   | 13808       | 125296   | 0.10 ± 0.12 | 0.02 |
| 790.6 | C46 H80 N O7 P |       | 17:0p/24:6 | 26.369 | 234730   | 189245      | 1074319  | 0.21 ± 0.13 | 0.03 |
| 790.6 | C46 H80 N O7 P | 1.03  | 17:0p/24:6 | 26.736 | 1471904  | 428894      | 1542243  | 0.48 ± 0.02 | 0.07 |
| 792.6 |                |       | x          | 25.191 | 202286   | 133039      | 167566   | 0.09 ± 0.05 | 0.01 |
| 792.6 |                |       | x          | 25.426 | 400689   | 88946       | 178279   | 0.10 ± 0.04 | 0.01 |
| 792.6 | C46 H82 N O7 P | 3.71  | 41:6a      | 26.479 | 717343   | 172531      | 404836   | 0.19 ± 0.06 | 0.03 |
| 792.6 | C46 H82 N O7 P | 8.51  | 17:1a/24:5 | 26.751 | 887723   | 319164      | 734536   | 0.29 ± 0.06 | 0.05 |
| 792.6 | C46 H82 N O7 P | 0.46  | 17:0p/24:5 | 27.281 | 3066656  | 1769817     | 3397626  | 1.34 ± 0.52 | 0.21 |
| 792.6 | C46 H82 N O7 P | 0.46  | 17:0p/24:5 | 27.882 | 5329340  | 1784837     | 6321431  | 1.90 ± 0.08 | 0.29 |
| 794.6 |                |       | x          | 26.49  | 164445   | 119421      | 394538   | 0.10 ± 0.04 | 0.02 |
| 794.6 |                |       | x          | 27.781 | 887897   | 470234      | 1635210  | 0.44 ± 0.12 | 0.07 |
| 794.6 |                |       | x          | 27.982 | 474833   | 175036      | 41050    | 0.12 ± 0.10 | 0.02 |
| 794.6 |                |       | x          | 28.092 | 698967   | 13406       | 41050    | 0.09 ± 0.13 | 0.01 |
| 802.6 |                |       |            | 25.016 | 455220   | 55109       | 247816   | 0.10 ± 0.05 | 0.01 |
| 802.6 | C47 H80 N O7 P |       | 18:1p/24:6 | 26.091 | 1042101  | 253668      | 1360347  | 0.35 ± 0.07 | 0.05 |
| 804.6 |                |       | x          | 25.118 | 737469   | 109015      | 477399   | 0.17 ± 0.07 | 0.03 |
| 804.6 | C47 H82 N O7 P | 1.83  | 18:1a/24:6 | 26.304 | 15637636 | 5244968     | 18845881 | 5.62 ± 0.28 | 0.87 |
| 804.6 | C47 H82 N O7 P |       | 18:1p/24:5 | 27.19  | 2048222  | 548549      | 2132768  | 0.65 ± 0.05 | 0.10 |
| 806.6 | C47 H84 N O7 P | 0.39  | 18:0a/24:6 | 27.432 | 15938488 | 6041629     | 18162474 | 5.88 ± 0.65 | 0.90 |
| 806.6 | C47 H84 N O7 P | 9.16  | 18:1a/24:5 | 28.014 | 3091495  | 433193      | 2882429  | 0.80 ± 0.30 | 0.12 |
| 806.6 |                |       | x          | 28.546 | 311126   | 416413      | 35159    | 0.19 ± 0.23 | 0.03 |
| 806.6 | C47 H84 N O7 P |       | 18:0p/24:5 | 28.759 | 534366   | 129889      | 496976   | 0.16 ± 0.02 | 0.02 |
| 808.6 | C47 H86 N O7 P | 4.54  | 18:0a/24:5 | 29.133 | 3758161  | 811192      | 2893456  | 1.02 ± 0.22 | 0.16 |
| 810.6 |                |       | x          | 25.725 | 825348   | 123307      | 755823   | 0.22 ± 0.07 | 0.03 |
| 818.6 |                |       | x          | 27.629 | 201141   | 58941       | 97968    | 0.05 ± 0.02 | 0.01 |
| 818.6 |                |       | x          | 28.112 | 381352   | 62066       | 420589   | 0.11 ± 0.04 | 0.02 |
| 818.6 |                |       | x          | 28.331 | 183494   | 93229       | 53532    | 0.06 ± 0.04 | 0.01 |
| 820.6 |                |       | x          | 26.682 | 462212   | 144484      | 348331   | 0.14 ± 0.03 | 0.02 |
| 820.6 |                |       | x          | 27.171 | 247054   | 63670       | 110850   | 0.06 ± 0.03 | 0.01 |
| 822.6 | C47 H85 N O8 P |       | 18:0/24:5  | 27.766 | 1527016  | 232611      | 910158   | 0.35 ± 0.14 | 0.05 |
| 832.6 |                |       | x          | 28.231 | 462898   | 329163      | 579985   | 0.23 ± 0.11 | 0.04 |
| 834.6 | C49 H88 N O7 P | 0.22  | 20:1a/24:5 | 29.392 | 1223421  | 313696      | 1723035  | 0.43 ± 0.10 | 0.07 |
| 836.6 |                |       | x          | 26.71  | 183883   | 173427      | 376306   | 0.12 ± 0.06 | 0.02 |
| 836.6 |                |       | x          | 31.126 | 38998    | 24955.02383 | 54148    | 0.01 ± 0.01 | 0.00 |

**Choline glycerophospholipids (PC)**

|       |  |  |   |        |         |        |         |             |      |
|-------|--|--|---|--------|---------|--------|---------|-------------|------|
| 706.6 |  |  | x | 21.979 | 1205627 | 457820 | 1540933 | 0.02 ± 0.00 | 0.01 |
|-------|--|--|---|--------|---------|--------|---------|-------------|------|

|       |                |      |            |        |            |           |            |              |      |
|-------|----------------|------|------------|--------|------------|-----------|------------|--------------|------|
| 712.6 | C40 H74 N O7 P |      | 16:1a/16:3 | 17.404 | 380148     | 400863    | 1083926    | 0.01 ± 0.01  | 0.00 |
| 716.6 | C40 H78 N O7 P |      | 16:0a/16:2 | 23.178 | 3373571    | 673857    | 1820497    | 0.04 ± 0.01  | 0.01 |
| 718.6 | C40 H80 N O7 P | 0.16 | 14:0a/18:1 | 24.98  | 15075635   | 5127217   | 14194917   | 0.22 ± 0.01  | 0.06 |
| 720.6 | C40 H82 N O7 P | 2.46 | 16:0a/16:0 | 27.047 | 6510070    | 2680579   | 8045760    | 0.11 ± 0.02  | 0.03 |
| 724.6 |                |      | x          | 17.348 | 1073579    | 222235    | 989350     | 0.01 ± 0.00  | 0.00 |
| 726.6 | C41 H76 N O7 P | 5.63 | 33:4a      | 20.173 | 2762235    | 546338    | 2258542    | 0.03 ± 0.01  | 0.01 |
| 730.6 |                |      | x          | 24.374 | 702657     | 157624    | 168466     | 0.01 ± 0.00  | 0.00 |
| 730.6 |                |      | x          | 24.867 | 588984     | 202638    | 754048     | 0.01 ± 0.00  | 0.00 |
| 730.6 |                |      | x          | 25.545 | 557911     | 68325     | 327657     | 0.01 ± 0.00  | 0.00 |
| 732.6 | C40 H78 N O8 P | 4.67 | 16:0/16:1  | 22.732 | 10408631   | 3097793   | 10522179   | 0.15 ± 0.01  | 0.04 |
| 734.6 |                |      | x          | 25.315 | 3328844    | 741186    | 2905744    | 0.04 ± 0.01  | 0.01 |
| 734.6 |                |      | x          | 26.837 | 408199     | 114740    | 458617     | 0.01 ± 0.00  | 0.00 |
| 736.6 | C42 H74 N O7 P | 1.31 | x          | 17.172 | 15274743   | 4995087   | 14914353   | 0.22 ± 0.00  | 0.06 |
| 736.6 |                |      | x          | 18.595 | 129890     | 149626    | 747876     | 0.01 ± 0.00  | 0.00 |
| 738.6 |                |      | x          | 19.111 | 2674534    | 564114    | 2887142    | 0.04 ± 0.01  | 0.01 |
| 738.6 | C42 H76 N O7 P | 1.06 | 14:1a/20:4 | 20.094 | 206103863  | 69191109  | 209451797  | 3.07 ± 0.10  | 0.86 |
| 740.6 | C42 H78 N O7 P | 1.04 | 14:0a/20:4 | 22.526 | 624434915  | 209269202 | 523538362  | 8.73 ± 0.73  | 2.45 |
| 742.6 | C42 H80 N O7 P | 0.02 | 14:0a/20:3 | 24.038 | 12273494   | 2576095   | 4815289    | 0.12 ± 0.05  | 0.03 |
| 744.6 | C42 H82 N O7 P | 3.32 | 16:1a/18:1 | 25.844 | 15735892   | 3394410   | 8528130    | 0.17 ± 0.05  | 0.05 |
| 746.6 | C42 H84 N O7 P | 1.1  | 16:0a/18:1 | 27.389 | 43766306   | 15228375  | 40626091   | 0.64 ± 0.03  | 0.18 |
| 750.6 | C43 H76 N O7 P | 1.49 | 35:6a      | 19.092 | 2674366    | 1716831   | 5458183    | 0.07 ± 0.02  | 0.02 |
| 750.6 |                |      | x          | 19.37  | 0          | 2322059   | 5423885    | 0.06 ± 0.05  | 0.02 |
| 750.6 |                |      | x          | 20.164 | 0          | 493856    | 1350996    | 0.01 ± 0.01  | 0.00 |
| 752.6 | C43 H78 N O7 P | 0.04 | 35:5a      | 21.807 | 22887857   | 9026782   | 3012511    | 0.26 ± 0.19  | 0.07 |
| 752.6 | C43 H78 N O7 P | 1.69 | 15:0a/20:5 | 22.409 | 38282192   | 14043722  | 11609649   | 0.45 ± 0.24  | 0.13 |
| 754.6 | C43 H80 N O7 P | 1.3  | 35:4a      | 23.885 | 35211018   | 15207867  | 42553441   | 0.61 ± 0.09  | 0.17 |
| 754.6 | C43 H80 N O7 P | 1.84 | 15:0a/20:4 | 24.362 | 98283037   | 28887779  | 76343420   | 1.28 ± 0.13  | 0.36 |
| 758.6 |                |      | x          | 27.327 | 1169507    | 50837     | 1159006    | 0.01 ± 0.01  | 0.00 |
| 758.6 | C43 H84 N O7 P |      | 35:2a      | 28.181 | 5603365    | 1681247   | 5360172    | 0.08 ± 0.00  | 0.02 |
| 760.6 | C42 H82 N O8 P | 1.6  | 16:0/18:1  | 25.703 | 43409874   | 14638231  | 37376518   | 0.61 ± 0.04  | 0.17 |
| 764.6 | C44 H78 N O7 P | 0.04 | 16:1a/20:5 | 21.09  | 38752615   | 12514964  | 36939958   | 0.56 ± 0.00  | 0.16 |
| 764.6 | C44 H78 N O7 P | 1.92 | 36:6a      | 22.256 | 32573775   | 13773640  | 32743669   | 0.52 ± 0.08  | 0.15 |
| 766.6 | C44 H80 N O7 P | 0.24 | 16:1a/20:4 | 23.39  | 89830776   | 34674334  | 100791196  | 1.45 ± 0.14  | 0.41 |
| 766.6 | C44 H80 N O7 P | 1.59 | 16:0a/20:5 | 24.27  | 783679850  | 330657467 | 952095680  | 13.45 ± 1.87 | 3.78 |
| 766.6 | C44 H80 N O7 P | 2.2  | 16:0a/20:5 | 25.235 | 78502281   | 15889500  | 37307564   | 0.80 ± 0.30  | 0.22 |
| 768.6 | C44 H82 N O7 P |      | 16:0a/20:4 |        |            | 18403922  | 51181778   | 0.53 ± 0.46  | 0.15 |
| 768.6 | C44 H82 N O7 P | 1.65 | 16:0a/20:4 | 25.755 | 2181659130 | 608964524 | 2035239346 | 29.73 ± 2.36 | 8.35 |
| 780.6 | C44 H78 N O8 P | 1.39 | 16:0/20:5  | 21.73  | 207041399  | 66118879  | 207333956  | 3.02 ± 0.10  | 0.85 |

|       |                |       |                         |        |           |           |           |             |      |
|-------|----------------|-------|-------------------------|--------|-----------|-----------|-----------|-------------|------|
| 782.6 | C44 H80 N O8 P | 0.17  | 16:0/20:4               | 23.851 | 233511879 | 68229990  | 226357719 | 3.27 ± 0.21 | 0.92 |
| 786.6 | C44 H84 N O8 P | 0.8   | 18:1/18:1               | 26.122 | 12364560  | 5046301   | 8330190   | 0.18 ± 0.05 | 0.05 |
| 788.6 | C44 H86 N O8 P | 5.86  | 18:0/18:1               | 25.68  | 21157204  | 2638555   | 7019004   | 0.18 ± 0.11 | 0.05 |
| 788.6 | C44 H86 N O8 P | 2.14  | 36:1                    | 28.019 | 10813514  | 3178732   | 11217346  | 0.16 ± 0.01 | 0.04 |
| 792.6 | C46 H82 N O7 P | 1.73  | 18:1a/20:5              | 24.703 | 203332565 | 70142231  | 189446430 | 2.97 ± 0.13 | 0.83 |
| 792.6 | C46 H82 N O7 P | 2.23  | 16:0a/22:6              | 25.508 | 78379773  | 21309036  | 59923316  | 0.99 ± 0.12 | 0.28 |
| 794.6 | C46 H84 N O7 P | 2.54  | 18:1a/20:4              | 26.026 | 388694277 | 133789735 | 358499952 | 5.65 ± 0.27 | 1.59 |
| 794.6 | C46 H84 N O7 P | 0.15  | 18:0a/20:5              | 26.778 | 83173233  | 25055521  | 66912272  | 1.11 ± 0.09 | 0.31 |
| 796.6 | C46 H86 N O7 P | 1.97  | 38:4a                   | 27.54  | 14478521  | 7351858   | 20618151  | 0.28 ± 0.06 | 0.08 |
| 796.6 | C46 H86 N O7 P | 2.1   | 18:0a/20:4              | 28.096 | 95023040  | 30596038  | 85207472  | 1.34 ± 0.04 | 0.38 |
| 806.6 | C46 H80 N O8 P | 5.13  | 18:1/20:5               | 22.432 | 35412801  | 13436621  | 39699884  | 0.57 ± 0.05 | 0.16 |
| 806.6 | C46 H80 N O8 P | 3.27  | 16:0/22:6               | 23.592 | 14579991  | 4998836   | 14026891  | 0.21 ± 0.01 | 0.06 |
| 808.8 | C46 H82 N O8 P | 4.68  | 18:1/20:4               | 24.432 | 40088362  | 13676972  | 37745207  | 0.58 ± 0.02 | 0.16 |
| 808.8 | C46 H82 N O8 P | 0.84  | 18:0/20:5               | 25.227 | 35668936  | 13269198  | 35003774  | 0.54 ± 0.04 | 0.15 |
| 810.8 | C46 H84 N O8 P | 9.67  | 18:1/20:3               | 25.917 | 12792808  | 6852785   | 17523176  | 0.25 ± 0.06 | 0.07 |
| 810.8 | C46 H84 N O8 P | 3.25  | 18:0/20:4               | 26.439 | 48935785  | 15485867  | 41913149  | 0.68 ± 0.04 | 0.19 |
| 814.8 | C46 H88 N O8 P | 1.93  | 18:1/20:1               | 28.359 | 10844853  | 3721842   | 10177968  | 0.16 ± 0.01 | 0.04 |
| 816.8 | C46 H90 N O8 P | 1.45  | 18:0/20:1               | 30.305 | 2955229   | 564231    | 2861409   | 0.04 ± 0.01 | 0.01 |
| 818.8 | C48 H84 N O7 P | 2.83  | 39:0a                   | 25.282 | 12071915  | 4040996   | 11652664  | 0.18 ± 0.00 | 0.05 |
| 818.8 | C48 H84 N O7 P | 7.24  | 39:0a                   | 25.848 | 12731980  | 7004397   | 12840644  | 0.23 ± 0.07 | 0.06 |
| 820.8 | C48 H86 N O7 P | 6.43  | 40:6a                   | 26.595 | 6759869   | 3346785   | 10649350  | 0.14 ± 0.03 | 0.04 |
| 820.8 | C48 H86 N O7 P | 1.18  | 16:0a/24:6              | 27.076 | 168376990 | 62442265  | 171381433 | 2.59 ± 0.17 | 0.73 |
| 822.8 | C48 H88 N O7 P |       | 18:0a/22:5              | 27.066 | 46698390  | 1068577   | 3185272   | 0.26 ± 0.36 | 0.07 |
| 822.8 | C48 H88 N O7 P | 2.33  | 16:0a/24:5              | 28.359 | 114364746 | 38679332  | 115297383 | 1.70 ± 0.05 | 0.48 |
| 824.8 | C47 H86 N O8 P | 14.18 | 39:4                    | 24.648 | 3032714   | 205801    | 1471766   | 0.03 ± 0.02 | 0.01 |
| 824.8 | C47 H86 N O8 P | 5.56  | 39:4                    | 25.188 | 19898494  | 1251030   | 16862976  | 0.20 ± 0.13 | 0.06 |
| 824.8 | C48 H90 N O7 P | 11.86 | 40:4a                   | 30.499 | 1581467   | 73247     | 1824943   | 0.02 ± 0.01 | 0.01 |
| 826.8 |                |       | x                       | 25.827 | 2807799   | 633962    | 1420269   | 0.03 ± 0.01 | 0.01 |
| 832.8 | C48 H82 N O8 P | 1.66  | 40:7                    | 23.72  | 3218640   | 1280594   | 4243020   | 0.06 ± 0.01 | 0.02 |
| 832.8 | C48 H82 N O8 P | 13.57 | 40:7                    | 27.098 | 4805145   | 665124    | 2545887   | 0.05 ± 0.02 | 0.01 |
| 832.8 | C49 H86 N O7 P | 1.16  | 41:7a                   | 27.84  | 20877558  | 7422567   | 22278371  | 0.32 ± 0.02 | 0.09 |
| 834.8 | C48 H84 N O8 P | 7.12  | 16:0/24:6+20:1/<br>20:5 | 25.511 | 171824852 | 52237928  | 150049658 | 2.35 ± 0.11 | 0.66 |
| 834.8 | C49 H88 N O7 P | 2.54  | 41:6a                   | 29.119 | 25154198  | 3732158   | 27830205  | 0.32 ± 0.13 | 0.09 |
| 838.8 | C48 H88 N O8 P |       | 40:4                    | 26.752 | 27250155  | 11218965  | 31178527  | 0.45 ± 0.05 | 0.13 |
| 838.8 | C48 H88 N O8 P | 2.47  | 40:4                    | 28.27  | 4288402   | 587039    | 3277074   | 0.05 ± 0.02 | 0.01 |
| 838.8 | C48 H88 N O8 P | 3.5   | 40:4                    | 28.906 | 5005184   | 1826903   | 2530120   | 0.06 ± 0.02 | 0.02 |
| 840.8 | C50 H82 N O7 P | 2.94  | 41:3a                   | 23.223 | 2441370   | 843573    | 1726119   | 0.03 ± 0.01 | 0.01 |

|       |                |       |            |        |          |          |          |             |      |
|-------|----------------|-------|------------|--------|----------|----------|----------|-------------|------|
| 842.8 | C48 H92 N O8 P | 4.43  | 18:1/22:1  | 30.528 | 2011067  | 427667   | 1025378  | 0.02 ± 0.01 | 0.01 |
| 846.8 | C50 H88 N O7 P | 1.32  | 18:1a/24:6 | 27.408 | 26259610 | 7688227  | 24155633 | 0.36 ± 0.02 | 0.10 |
| 848.8 | C49 H86 N O8 P | 4.7   | 41:6       | 24.106 | 23966871 | 7742574  | 23483677 | 0.35 ± 0.01 | 0.10 |
| 848.8 | C49 H86 N O8 P | 29.12 | 41:6       | 26.27  | 4308368  | 302230   | 216929   | 0.03 ± 0.03 | 0.01 |
| 848.8 | C49 H86 N O8 P | 19.1  | 41:6       | 26.68  | 4303742  | 177135   | 817460   | 0.03 ± 0.03 | 0.01 |
| 848.8 | C50 H90 N O7 P | 2.32  | 18:1a/24:5 | 28.713 | 11085155 | 4729938  | 11628275 | 0.18 ± 0.03 | 0.05 |
| 848.8 | C50 H90 N O7 P | 2.96  | 18:1a/24:5 | 29.335 | 6509588  | 1916080  | 6467678  | 0.09 ± 0.01 | 0.03 |
| 850.6 | C49 H88 N O8 P | 6.98  | 41:5       | 25.556 | 44115541 | 14482971 | 33392535 | 0.59 ± 0.08 | 0.17 |
| 850.6 | C50 H92 N O7 P | 1.67  | 18:0a/24:5 | 30.49  | 9418191  | 3189309  | 9371124  | 0.14 ± 0.00 | 0.04 |
| 852.6 |                |       | x          | 18.689 | 3063982  | 1557156  | 4313480  | 0.06 ± 0.01 | 0.02 |
| 852.6 | C49 H90 N O8 P | 9.02  | 41:4       | 26.79  | 7922194  | 2969405  | 8393353  | 0.12 ± 0.01 | 0.03 |
| 858.8 | -              |       | x          | 31.252 | 900759   | 833225   | 2125919  | 0.03 ± 0.01 | 0.01 |
| 860.8 | C50 H86 N O8 P | 8.01  | 18:1/24:6  | 25.902 | 20624501 | 7939587  | 23575958 | 0.34 ± 0.03 | 0.09 |
| 860.8 | C50 H86 N O8 P | 21    | 18:0/24:5  | 26.738 | 1671213  | 893553   | 636847   | 0.02 ± 0.02 | 0.01 |
| 862.8 | C50 H88 N O8 P | 2.24  | 18:1/24:5  | 27.189 | 11359107 | 4370773  | 13133001 | 0.19 ± 0.02 | 0.05 |
| 862.8 | C50 H88 N O8 P | 1.66  | 18:0/24:6  | 27.785 | 25773312 | 7777722  | 26834325 | 0.37 ± 0.03 | 0.11 |
| 864.8 | C50 H90 N O8 P | 9.24  | 42:5       | 28.513 | 1877340  | 879655   | 3016068  | 0.04 ± 0.01 | 0.01 |
| 864.8 | C50 H90 N O8 P | 1.6   | 18:0/24:5  | 29.101 | 19350340 | 7647303  | 20685905 | 0.31 ± 0.03 | 0.09 |
| 868.8 | C51 H82 N O8 P | 3.9   | 42:7       | 18.556 | 2800826  | 1096531  | 2560779  | 0.04 ± 0.01 | 0.01 |
| 870.8 | C51 H84 N O8 P | 1.99  | 42:8       | 21.432 | 10138762 | 3268405  | 9825469  | 0.15 ± 0.00 | 0.04 |
| 872.8 | C51 H86 N O8 P | 1.93  | 42:1       | 23.59  | 1914998  | 876069   | 2417728  | 0.03 ± 0.01 | 0.01 |
| 872.8 |                |       | x          | 23.961 | 864337   | 91605    | 212337   | 0.01 ± 0.01 | 0.00 |
| 874.8 | C51 H88 N O8 P | 16.86 | 42:0       | 27.128 | 847330   | 350704   | 316644   | 0.01 ± 0.01 | 0.00 |
| 874.8 |                |       | x          | 27.847 | 564299   | 129410   | 305208   | 0.01 ± 0.00 | 0.00 |
| 874.8 | C52 H92 N O7 P | 0.71  | 44:7a      | 29.637 | 3172281  | 1067654  | 2395487  | 0.04 ± 0.01 | 0.01 |
| 876.8 | C51 H90 N O8 P | 1.92  | 19:0/24:6  | 26.483 | 5686214  | 2018719  | 5605267  | 0.09 ± 0.00 | 0.02 |
| 876.8 | C52 H94 N O7 P | 1.33  | 44:6a      | 31.002 | 1841823  | 717213   | 2206149  | 0.03 ± 0.00 | 0.01 |
| 878.8 | C51 H92 N O8 P | 7.44  | 43:7       | 27.795 | 4358394  | 1439646  | 5142784  | 0.07 ± 0.01 | 0.02 |
| 884.8 |                |       | x          | 25.451 | 958986   | 96951    | 166681   | 0.01 ± 0.01 | 0.00 |
| 886.8 | C52 H88 N O8 P |       | 20:3/24:5  | 26.66  | 1909713  | 708107   | 2169897  | 0.03 ± 0.00 | 0.01 |
| 886.8 |                |       | x          | 27.534 | 1850263  | 678530   | 2388036  | 0.03 ± 0.00 | 0.01 |
| 888.8 | C52 H90 N O8 P | 1.33  | 20:1/24:6  | 28.029 | 20046131 | 6531569  | 20834581 | 0.30 ± 0.01 | 0.08 |
| 888.8 |                |       | x          | 28.725 | 217743   | 184865   | 641947   | 0.01 ± 0.00 | 0.00 |
| 890.8 | C52 H92 N O8 P | 1.5   | 20:1/24:5  | 29.293 | 11535141 | 4275031  | 12787375 | 0.18 ± 0.01 | 0.05 |
| 890.8 | C52 H92 N O8 P |       | 20:0/24:6  | 29.95  | 2484232  | 312195   | 1579725  | 0.02 ± 0.01 | 0.01 |
| 892.8 |                |       | x          | 31.35  | 1330663  | 726192   | 1513239  | 0.02 ± 0.01 | 0.01 |
| 894.8 |                |       | x          | 21.001 | 1553124  | 449442   | 1136167  | 0.02 ± 0.00 | 0.01 |
| 898.8 |                |       | x          | 24.305 | 541607   | 152237   | 620920   | 0.01 ± 0.00 | 0.00 |

|                                         |                 |      |            |        |           |          |           |              |      |
|-----------------------------------------|-----------------|------|------------|--------|-----------|----------|-----------|--------------|------|
| 902.8                                   |                 |      | x          | 31.857 | 689234    | 587942   | 1283029   | 0.02 ± 0.01  | 0.01 |
| 904.8                                   |                 |      | x          | 28.711 | 1036367   | 168661   | 892889    | 0.01 ± 0.00  | 0.00 |
| 904.8                                   |                 |      | x          | 33.228 | 844098    | 311795   | 1532716   | 0.02 ± 0.01  | 0.00 |
| 906.8                                   |                 |      | x          | 29.97  | 268066    | 166757   | 397731    | 0.01 ± 0.00  | 0.00 |
| 912.8                                   |                 |      | x          | 27.883 | 579315    | 230977   | 444169    | 0.01 ± 0.00  | 0.00 |
| 914.8                                   |                 |      | x          | 29.315 | 328246    | 145557   | 282196    | 0.01 ± 0.00  | 0.00 |
| 916.8                                   | C54 H94 N O8 P  | 3.69 | 22:1/24:6  | 30.203 | 2310470   | 1024651  | 2842206   | 0.04 ± 0.01  | 0.01 |
| 918.8                                   | C54 H96 N O8 P  | 2.25 | 22:1/24:5  | 31.556 | 2387515   | 94474    | 2526084   | 0.03 ± 0.02  | 0.01 |
| 922.8                                   | C54 H100 N O8 P |      | 22:0/24:4  | 23.863 | 1204663   | 726966   | 1575974   | 0.02 ± 0.01  | 0.01 |
| 924.8                                   | C55 H90 N O8 P  | 5.07 | 46:3       | 25.382 | 2879109   | 821116   | 2846998   | 0.04 ± 0.00  | 0.01 |
| 926.8                                   | C54 H104 N O8 P |      | 22:1/24:1  | 26.539 | 642923    | 199166   | 559190    | 0.01 ± 0.00  | 0.00 |
| <b>Serine glycerophospholipids (PS)</b> |                 |      |            |        |           |          |           |              |      |
| 796.6                                   | C44 H78 N O9 P  |      | 18:1a/20:4 | 23.529 | 766031    | 405481   | 1274968   | 0.24 ± 0.06  | 0.06 |
| 820.6                                   | C46 H78 N O9 P  |      | 16:0p/24:6 | 24.216 | 1438357   | 31949    | 1414734   | 0.21 ± 0.16  | 0.05 |
| 822.6                                   | C46 H80 N O9 P  | 7.86 | 16:1a/24:5 | 24.755 | 14569282  | 4937018  | 17750359  | 3.40 ± 0.17  | 0.82 |
| 822.6                                   | C46 H80 N O9 P  | 0.67 | 16:0p/24:5 | 25.354 | 9384798   | 3714482  | 12235202  | 2.37 ± 0.26  | 0.57 |
| 824.6                                   | C46 H82 N O9 P  | 5.52 | 16:0a/24:5 | 25.859 | 144768516 | 45872777 | 166301325 | 32.42 ± 0.85 | 7.85 |
| 834.6                                   | C47 H80 N O9 P  |      | 17:0p/24:6 | 24.317 | 81527     | 31887    | 233958    | 0.03 ± 0.02  | 0.01 |
| 836.6                                   | C47 H82 N O9 P  | 4.62 | 41:6a      | 25.69  | 5940519   | 552512   | 3257326   | 0.78 ± 0.48  | 0.19 |
| 836.6                                   | C47 H82 N O9 P  | 4.36 | 17:0p/24:5 | 26.575 | 3805916   | 2042517  | 6499002   | 1.19 ± 0.30  | 0.29 |
| 838.6                                   | C47 H84 N O9 P  |      | 17:0p/24:4 | 27.021 | 11294491  | 2749408  | 11921075  | 2.27 ± 0.32  | 0.55 |
| 848.6                                   | C48 H82 N O9 P  | 1.25 | 18:1p/24:5 | 25.162 | 2940918   | 1609717  | 3430729   | 0.82 ± 0.26  | 0.20 |
| 848.6                                   | C48 H82 N O9 P  |      | 18:1a/24:6 | 25.65  | 2255651   | 473749   | 2356642   | 0.43 ± 0.09  | 0.10 |
| 850.6                                   | C48 H84 N O9 P  | 0.65 | 18:1a/24:5 | 26.261 | 52904440  | 11900821 | 35349053  | 9.02 ± 2.42  | 2.18 |
| 852.6                                   | C48 H86 N O9 P  | 4.28 | 18:0a/24:5 | 28.094 | 46232344  | 15628357 | 54783892  | 10.69 ± 0.39 | 2.59 |
| 862.6                                   | C48 H80 N O10 P |      | 18:1/24:6  | 23.514 | 2470619   | 896448   | 3543599   | 0.63 ± 0.08  | 0.15 |
| 864.6                                   | C48 H82 N O10 P |      | 18:1/24:5  | 24.968 | 1512261   | 960981   | 2034640   | 0.47 ± 0.17  | 0.11 |
| 864.6                                   | C48 H82 N O10 P | 2.88 | 18:0/24:6  | 25.504 | 24673920  | 8300740  | 32337147  | 5.90 ± 0.53  | 1.43 |
| 864.6                                   |                 |      | x          | 26.041 | 2516518   | 62877    | 134790    | 0.21 ± 0.30  | 0.05 |
| 866.7                                   | C48 H84 N O10 P | 3.38 | 18:0/24:5  | 26.603 | 65127202  | 24172944 | 81588076  | 15.85 ± 1.23 | 3.84 |
| 888.6                                   | C50 H84 N O10 P |      | 20:2/24:6  | 24.319 | 1330825   | 453766   | 582835    | 0.24 ± 0.11  | 0.06 |
| 890.6                                   | C50 H86 N O10 P | 5.99 | 20:1/24:6  | 25.762 | 17169737  | 5264733  | 17378372  | 3.65 ± 0.16  | 0.88 |
| 892.6                                   | C50 H86 N O10 P | 2.46 | 20:1/24:5  | 26.944 | 21965041  | 7082939  | 23528169  | 4.83 ± 0.10  | 1.17 |
| 894.6                                   | C50 H88 N O10 P |      | 20:0/24:5  | 28.818 | 1697140   | 721374   | 2222632   | 0.44 ± 0.06  | 0.11 |
| 918.6                                   | C52 H84 N O10 P |      | 46:7       | 27.729 | 681309    | 342570   | 813444    | 0.18 ± 0.05  | 0.04 |
| 920.6                                   | C52 H86 N O10 P |      | 46:6       | 28.882 | 700628    | 102041   | 70690     | 0.08 ± 0.07  | 0.02 |
| 920.6                                   | C52 H86 N O10 P |      | 22:1/24:5  | 29.206 | 1150295   | 1010306  | 2643174   | 0.50 ± 0.22  | 0.12 |
| 920.6                                   | C52 H86 N O10 P |      | 46:6       | 29.616 | 654210    | 292300   | 210231    | 0.13 ± 0.08  | 0.03 |

|                                           |                 |       |            |        |          |         |          |              |      |
|-------------------------------------------|-----------------|-------|------------|--------|----------|---------|----------|--------------|------|
| 936.6                                     | C54 H82 N O10 P |       | 24:6/24:6  | 23.212 | 7511341  | 2506948 | 7963282  | 1.67 ± 0.07  | 0.40 |
| 938.6                                     | C54 H84 N O10 P | 10.12 | 24:5/24:6  | 24.789 | 3500485  | 1453142 | 3947065  | 0.86 ± 0.13  | 0.21 |
| 940.6                                     | C54 H86 N O10 P |       | 48:10      | 25.951 | 1763323  | 781354  | 2357276  | 0.47 ± 0.08  | 0.11 |
| 944.6                                     | C54 H90 N O10 P |       | 48:8       | 28.775 | 80761    | 46837   | 0        | 0.02 ± 0.02  | 0.00 |
| <b>Inositol glycerophospholipids (PI)</b> |                 |       |            |        |          |         |          |              |      |
| 843.6                                     | C45 H81 O12 P   | 10.79 | 16:0a/20:4 | 19.847 | 156225   | 20803   | 432404   | 0.84 ± 0.83  | 0.02 |
| 843.6                                     | C45 H81 O12 P   |       | 15:0/20:4  | 20.05  | 125139   | 30063   | 83808    | 0.36 ± 0.06  | 0.01 |
| 855.6                                     | C45 H77 O13 P   | 5.72  | 16:0/20:5  | 14.128 | 121755   | 47525   | 47866    | 0.37 ± 0.15  | 0.01 |
| 855.6                                     | C45 H77 O13 P   |       | x          | 20.221 | 45877    | 16110   | 65059    | 0.20 ± 0.06  | 0.01 |
| 857.6                                     | C45 H79 O13 P   | 6.93  | 16:0/20:4  | 17.126 | 550361   | 77633   | 494212   | 1.57 ± 0.67  | 0.04 |
| 883.6                                     | C47 H81 O13 P   | 5.65  | 18:0/20:5  | 19.67  | 317083   | 116828  | 203942   | 1.04 ± 0.19  | 0.03 |
| 885.6                                     | C47 H83 O13 P   | 6.37  | 18:0/20:4  | 21.996 | 815776   | 444980  | 604718   | 3.28 ± 1.15  | 0.09 |
| 887.6                                     | C47 H85 O13 P   |       | 18:0/20:3  | 24.976 | 132057   | 14155   | 29490    | 0.24 ± 0.18  | 0.01 |
| 891.6                                     | C47 H89 O13 P   |       | 18:0/20:1  | 25.968 | 203949   | 92879   | 78673    | 0.66 ± 0.32  | 0.02 |
| 895.6                                     | C49 H85 O12 P   | 5.92  | 16:0a/24:6 | 22.638 | 161062   | 60277   | 239409   | 0.72 ± 0.23  | 0.02 |
| 897.6                                     | C49 H87 O12 P   | 5.41  | 16:0a/24:5 | 24.31  | 597842   | 68688   | 299670   | 1.32 ± 0.66  | 0.04 |
| 909.6                                     | C49 H83 O13 P   | 3.46  | 16:0/24:6  | 20.324 | 1095523  | 263446  | 1072826  | 3.62 ± 0.85  | 0.10 |
| 909.6                                     |                 |       | x          | 20.746 | 132161   | 38894   | 54890    | 0.36 ± 0.12  | 0.01 |
| 911.6                                     | C49 H85 O13 P   | 5.15  | 16:0/24:5  | 22.572 | 1874625  | 900704  | 2002774  | 7.97 ± 1.50  | 0.22 |
| 911.6                                     | C51 H87 O13 P   | 8.54  | 18:0/22:5  | 23.636 | 226018   | 129009  | 122708   | 0.87 ± 0.42  | 0.02 |
| 913.6                                     | C49 H87 O13 P   | 2.68  | 18:0/22:4  | 24.369 | 984729   | 168459  | 895833   | 2.92 ± 1.04  | 0.08 |
| 923.6                                     | C51 H89 O12 P   | 6.61  | 17:0/24:6  | 24.636 | 309222   | 46163   | 81949    | 0.62 ± 0.38  | 0.02 |
| 925.6                                     | C50 H87 O13 P   | 2.53  | 17:0/24:5  | 24.235 | 488775   | 37596   | 254405   | 1.03 ± 0.63  | 0.03 |
| 925.6                                     | C51 H91 O12 P   | 1.79  | x          | 26.423 | 95388    | 17902   | 110605   | 0.32 ± 0.14  | 0.01 |
| 935.6                                     | C51 H85 O13 P   | 5.44  | 18:1/24:6  | 21.285 | 630036   | 231619  | 464411   | 2.15 ± 0.24  | 0.06 |
| 937.6                                     | C51 H87 O13 P   | 3.57  | 18:1/24:5  | 23.215 | 662255   | 405488  | 507923   | 2.84 ± 1.17  | 0.08 |
| 937.6                                     | C51 H87 O13 P   | 2.29  | 18:0/24:6  | 24.049 | 4648208  | 1467848 | 3588177  | 15.23 ± 0.49 | 0.43 |
| 939.6                                     |                 |       | x          | 24.657 | 118575   | 22887   | 40214    | 0.27 ± 0.12  | 0.01 |
| 939.6                                     | C51 H89 O13 P   | 2.77  | 18:0/24:5  | 25.301 | 12605037 | 4346374 | 11106504 | 44.44 ± 1.57 | 1.24 |
| 939.6                                     |                 |       | x          | 26.294 | 43743    | 15258   | 36736    | 0.15 ± 0.00  | 0.00 |
| 953.6                                     | C52 H91 O13 P   | 1.93  | 20:0a/24:5 | 26.266 | 327181   | 150238  | 178123   | 1.13 ± 0.41  | 0.03 |
| 963.6                                     | C53 H89 O13 P   | 4.04  | 20:1/24:6  | 24.469 | 790784   | 129323  | 362500   | 1.84 ± 0.73  | 0.05 |
| 965.6                                     | C53 H91 O13 P   | 4.61  | 20:1/24:5  | 25.564 | 804437   | 193490  | 616244   | 2.42 ± 0.38  | 0.07 |
| 967.6                                     | C53 H93 O13 P   |       | 20:0/24:5  | 27.036 | 94843    | 14351   | 31570    | 0.20 ± 0.11  | 0.01 |
| 967.6                                     |                 |       | x          | 27.442 | 32080    | 5740    | 15678    | 0.08 ± 0.03  | 0.00 |
| 991.6                                     | C55 H93 O13 P   | 11.39 | 22:2/24:5  | 26.205 | 141190   | 29566   | 33127    | 0.31 ± 0.17  | 0.01 |
| 993.6                                     |                 |       | x          | 28.413 | 66448    | 14391   | 15549    | 0.15 ± 0.08  | 0.00 |



**Supplementary Figure S7. Examples of MS/MS spectra of polar lipids.** Total lipids of the soft coral *Paragorgia arborea* were analyzed using reverse-phase liquid chromatography and tandem mass spectrometry at electrospray ionization (ESI) conditions in positive and negative modes. MS/MS spectra of the target ions, predicted structures, and product ions ( $m/z$ ) are shown for several molecular species of ceramide aminoethylphosphonate (CAEP) and four glycerophospholipid (GPL) classes: ethanolamine, choline, inositol and serine GPL (abbreviated here as PE, PC, PI, and PS, respectively).

CAEP 20:3d/16:0, precursor ion  $[M+H]^+$ ,  $m/z$  669.5

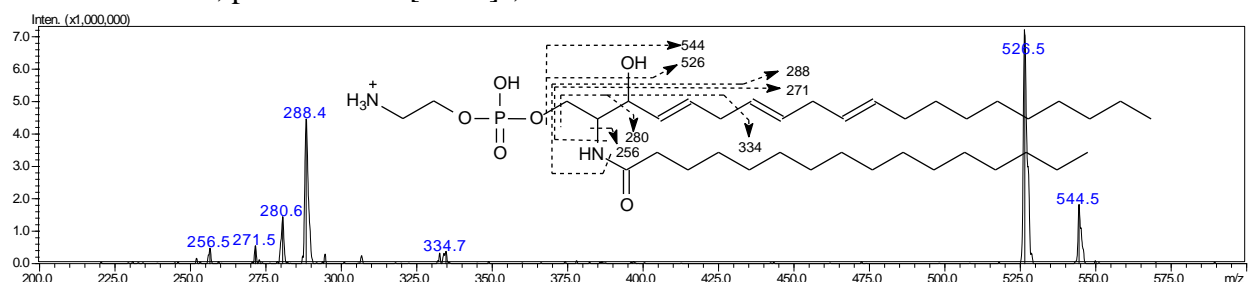

PC 16:0a/20:5, precursor ion  $[M+Li]^+$ ,  $m/z$  772.5

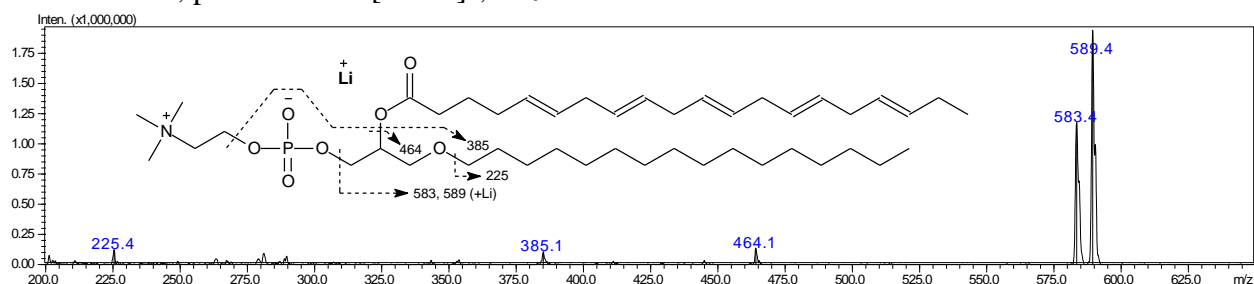

PC 16:0a/20:5, precursor ion  $[M+HCOO]^-$ ,  $m/z$  810.5

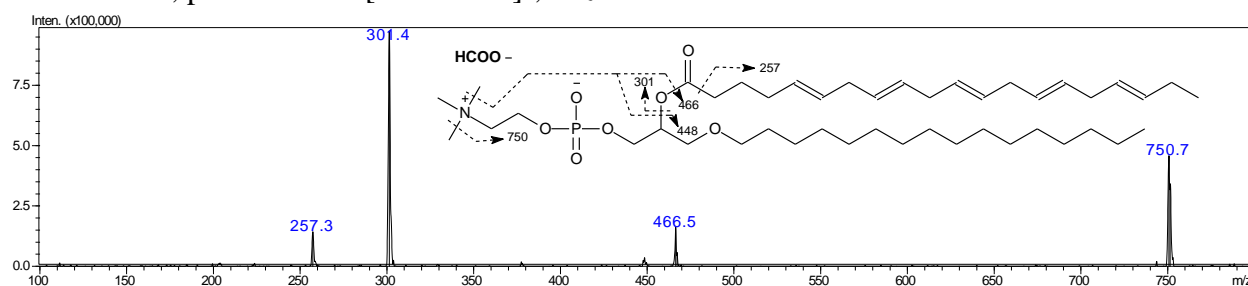

PC 16:0/20:5, precursor ion  $[M+Li]^+$ ,  $m/z$  786.5

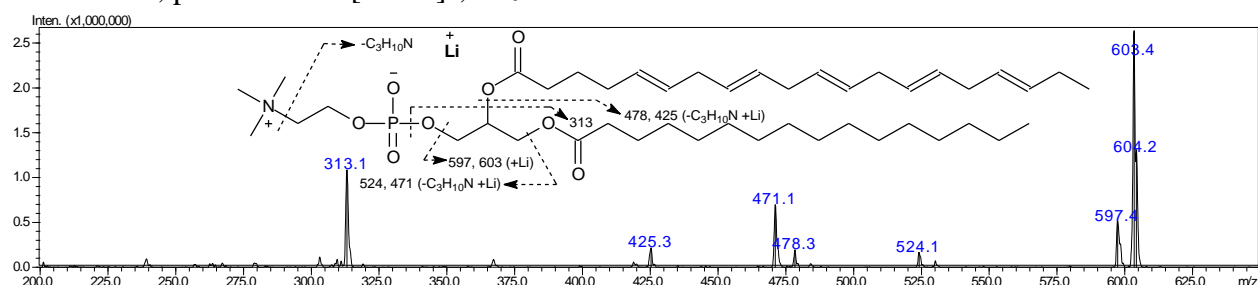



PC 16:0/20:5, precursor ion  $[M+HCOO]^-$ ,  $m/z$  824.5

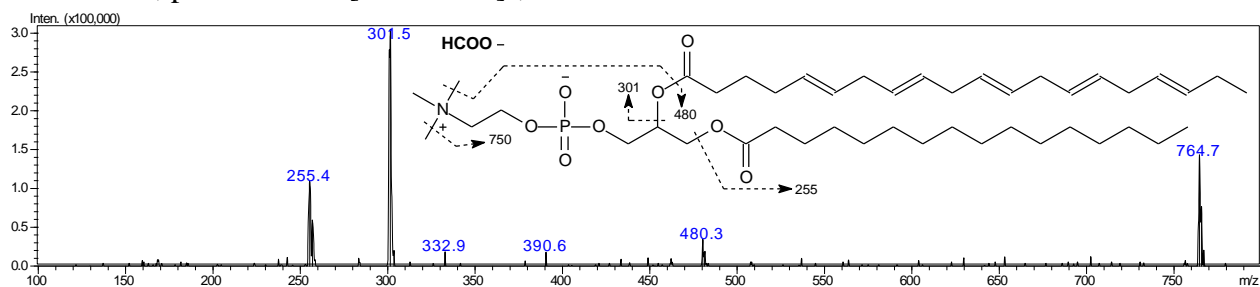

PE 16:1a/20:4, precursor ion  $[M+H]^+$ ,  $m/z$  724.5

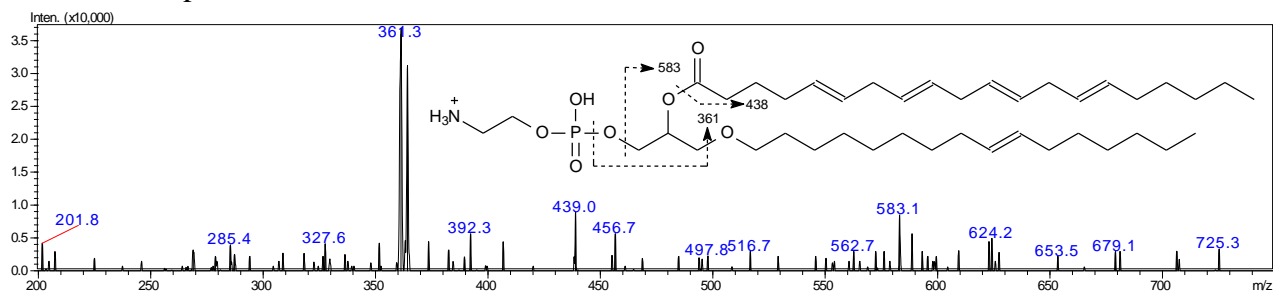

PE 16:1a/20:4, precursor ion  $[M-H]^-$ ,  $m/z$  722.5

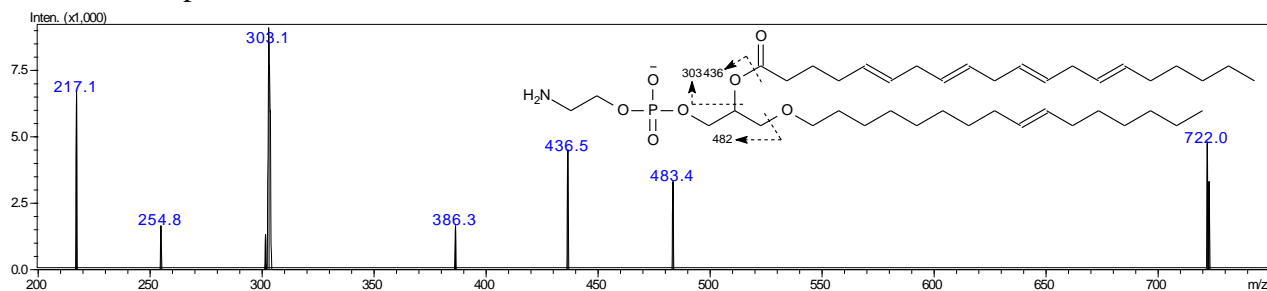

PE 16:0p/20:4, precursor ion  $[M+H]^+$ ,  $m/z$  724.5

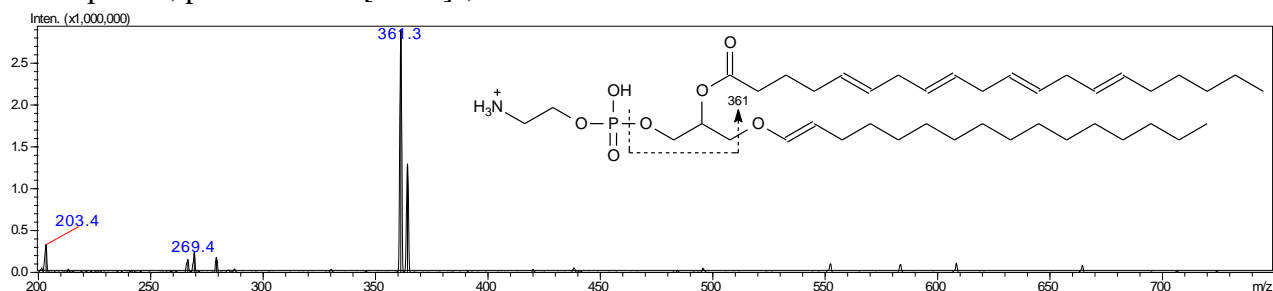

PE 16:0p/20:4, precursor ion  $[M-H]^-$ ,  $m/z$  722.5

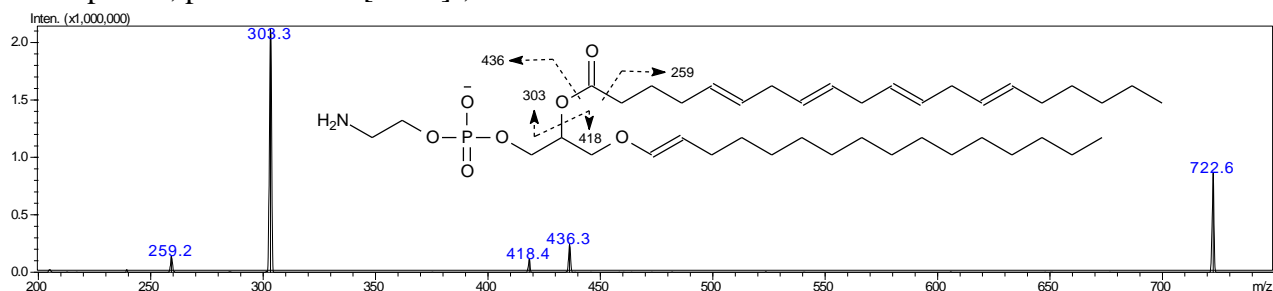

PS 16:0a/24:6, precursor ion  $[M+H]^+$ ,  $m/z$  822.6

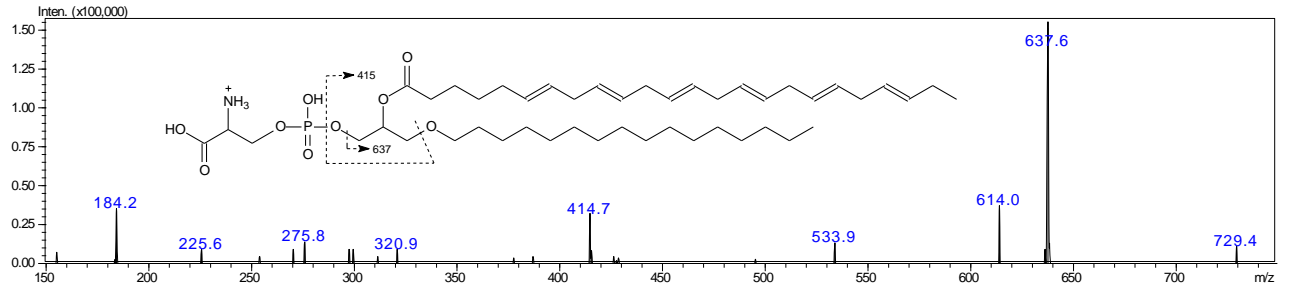

PS 16:0a/24:6, precursor ion  $[M-H]^-$ ,  $m/z$  820.6

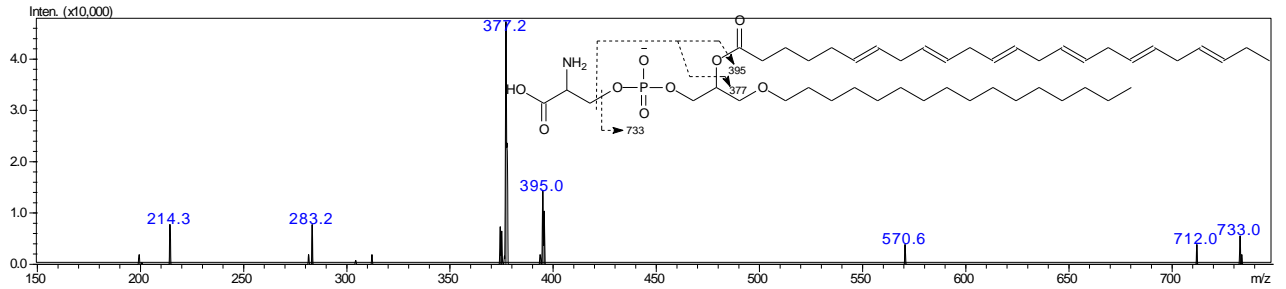

PS 16:0p/24:5, precursor ion  $[M+H]^+$ ,  $m/z$  822.6

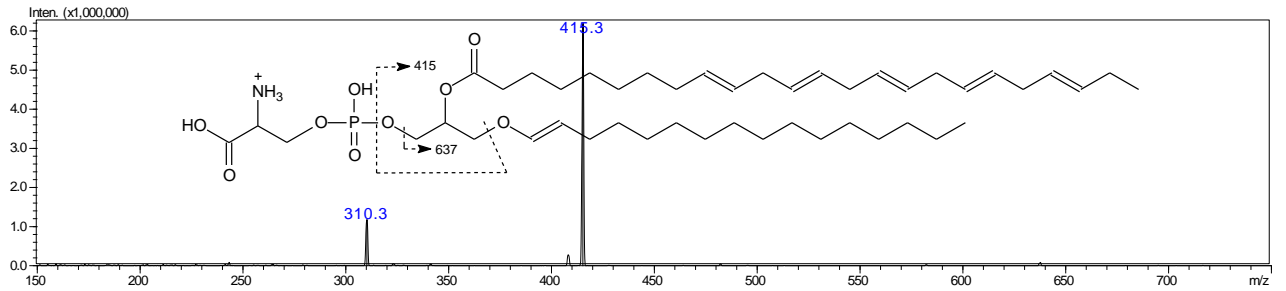

PS 16:0p/24:5, precursor ion  $[M-H]^-$ ,  $m/z$  820.6

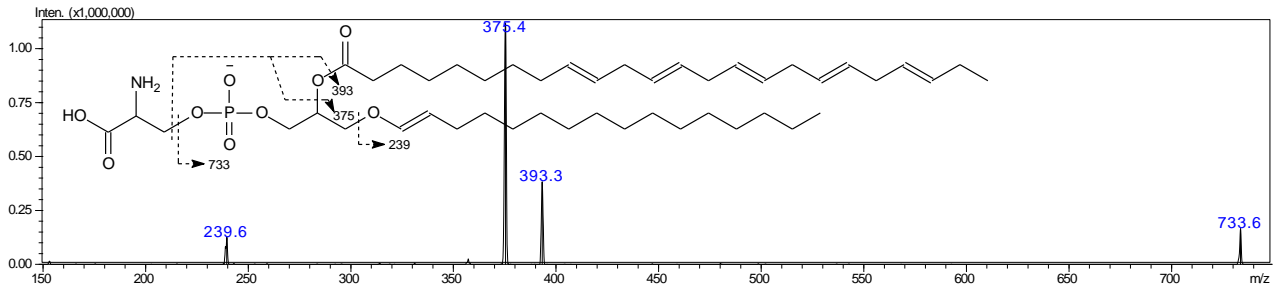

PS 18:0/24:5, precursor ion  $[M+H]^+$ ,  $m/z$  866.7

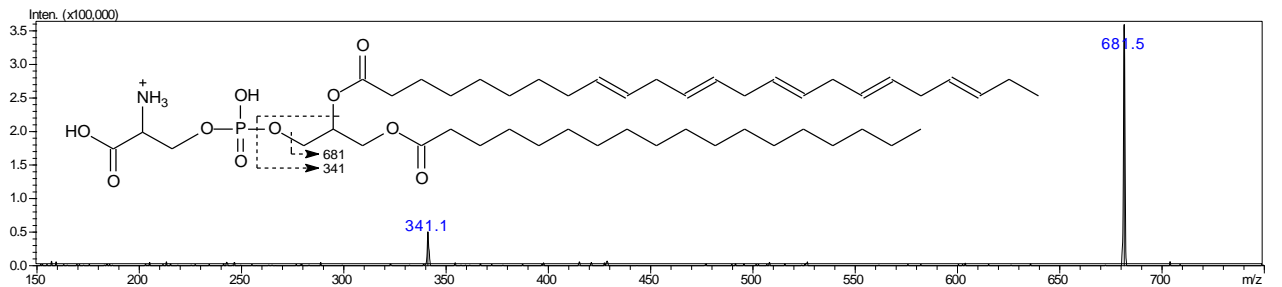

PS 18:0/24:5, precursor ion  $[M-H]^-$ ,  $m/z$  864.6

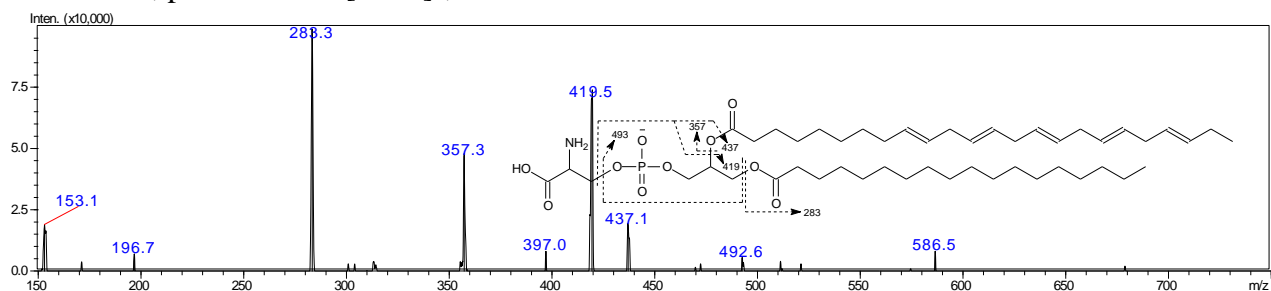

PI 16:0a/24:5, precursor ion  $[M-H]^-$ ,  $m/z$  897.6

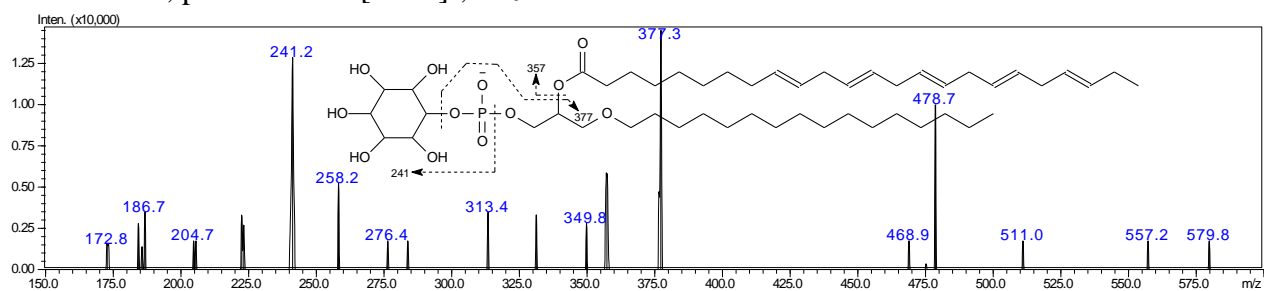

PI 16:0/24:5, precursor ion  $[M-H]^-$ ,  $m/z$  911.6

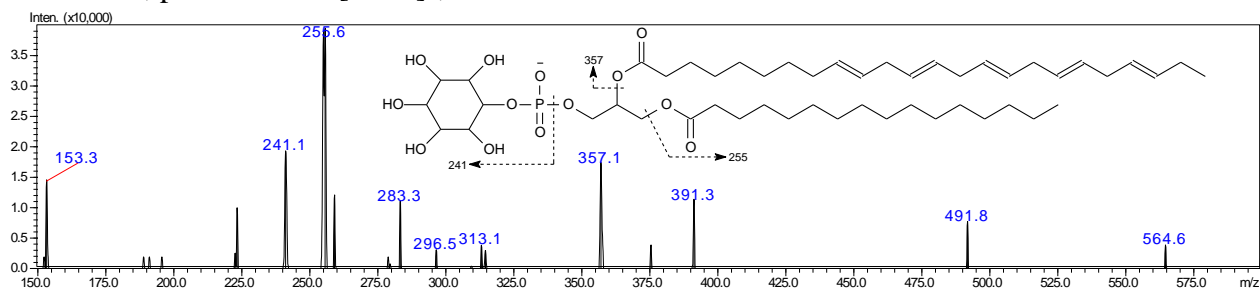

**Supplementary Table S4. Non-polar parts of ether GPL and DAGE.** A composition (% of lipid class, mean  $\pm$  SD) of molecular species of diacylglycerol ethers (DAGE,  $n = 6$ ) and ether glycerophospholipids (GPL,  $n = 3$ ) with similar 1-*O*-alkyl-2-acyl parts in the soft coral *Paragorgia arborea*. Alkyl/acyl parts are abbreviated as Xa/Y; Xa is alkyl group and Y is acyl group (number of carbon atoms : number of double bonds) at positions *sn*-1 and *sn*-2 of a glycerol ether backbone. Ethanolamine, choline, inositol and serine GPL are abbreviated as PE, PC, PI, and PS, respectively. nd, not detected.

| Alkyl and<br>acyl groups<br>in positions<br><i>sn</i> -1/ <i>sn</i> -2 | Content, % of lipid class |                  |                  |                  |                  |
|------------------------------------------------------------------------|---------------------------|------------------|------------------|------------------|------------------|
|                                                                        | DAGE                      | PE               | PC               | PS               | PI               |
| 14:0a/20:5                                                             | 3.33 $\pm$ 1.02           | nd               | nd               | nd               | nd               |
| 14:0a/20:4                                                             | 3.50 $\pm$ 1.00           | nd               | 8.73 $\pm$ 0.73  | nd               | nd               |
| 16:0a/20:5                                                             | 27.32 $\pm$ 1.85          | 0.67 $\pm$ 0.24  | 13.45 $\pm$ 1.87 | nd               | nd               |
| 16:0a/20:4+                                                            | 33.17 $\pm$ 4.84          | 24.75 $\pm$ 1.30 | 29.73 $\pm$ 2.36 | nd               | 0.84 $\pm$ 0.83  |
| 16:0p/20:4                                                             |                           |                  |                  |                  |                  |
| 18:1a/20:4                                                             | 1.24 $\pm$ 0.50           | 5.63 $\pm$ 0.22  | 5.65 $\pm$ 0.27  | 0.24 $\pm$ 0.06  | nd               |
| 18:1a/20:5                                                             | 3.22 $\pm$ 0.79           | 1.20 $\pm$ 0.22  | 2.97 $\pm$ 0.13  | nd               | nd               |
| 14:0a/24:5                                                             | 1.99 $\pm$ 0.57           | nd               | nd               | nd               | nd               |
| 16:1a/24:5                                                             | nd                        | 0.58 $\pm$ 0.10  | 0.14 $\pm$ 0.03  | nd               | nd               |
| 16:0a/24:6                                                             | 9.93 $\pm$ 2.99           | 9.40 $\pm$ 0.15  | 2.59 $\pm$ 0.17  | 3.40 $\pm$ 0.17  | 0.72 $\pm$ 0.23  |
| 16:0a/24:5                                                             | 4.18 $\pm$ 0.78           | 11.07 $\pm$ 0.93 | 1.7 $\pm$ 0.05   | 32.42 $\pm$ 0.85 | 1.32 $\pm$ 0.66  |
| 18:1a/24:6                                                             | 1.24 $\pm$ 0.50           | 5.88 $\pm$ 0.65  | 0.36 $\pm$ 0.02  | 0.43 $\pm$ 0.09  | nd               |
| 18:1a/24:5                                                             | nd                        | 5.62 $\pm$ 0.28  | 0.18 $\pm$ 0.03  | 9.02 $\pm$ 2.42  | nd               |
| 18:0a/24:5                                                             | nd                        | 1.02 $\pm$ 0.22  | 0.14 $\pm$ 0.00  | 10.69 $\pm$ 0.39 | nd               |
| 16:0/24:5                                                              | nd                        | nd               | nd               | nd               | 7.97 $\pm$ 1.50  |
| 18:0/24:6                                                              | nd                        | nd               | 0.37 $\pm$ 0.03  | 5.9 $\pm$ 0.53   | 15.23 $\pm$ 0.49 |
| 18:0/24:5                                                              | nd                        | 0.35 $\pm$ 0.14  | 0.31 $\pm$ 0.03  | 15.85 $\pm$ 1.23 | 44.44 $\pm$ 1.57 |
